# Supplementary material for: A Library of High-Entropy-Alloy Nanocrystals with Controlled Surface Atomic Arrangements for Catalysis
Source: Research Square preprint supplement (doi:10.21203/rs.3.rs-2691093/v1), 2023-03-22
Supplement: Supplementary file 1 [file 4a0a932cf135c7c4a9156654.pdf]

Extended data for

## **A Library of High-Entropy-Alloy Nanocrystals with Controlled Surface Atomic Arrangements for Catalysis**

Yueh-Chun Hsiao,<sup>1,2</sup> Cheng-Yu Wu,<sup>1</sup> Wen-Yang Huang,<sup>3</sup> Ho Viet Thang,<sup>4,5</sup> Chong-Chi Chi,<sup>6</sup> Wen-Jing Zeng,<sup>3</sup> Jia-Qi Gao,<sup>1</sup> Chih-Yi Lin,<sup>1</sup> Jui-Tai Lin,<sup>1</sup> Chih-Heng Lee,<sup>4</sup> Islam M. A. Mekhemer,<sup>1</sup> Ming-Yen Lu,<sup>6,7</sup> Ying-Rui Lu,<sup>8</sup> Ho-Hsiu Chou,<sup>1</sup> Shan Zhou,<sup>9</sup> Hsin-Yi Tiffany Chen,<sup>4,7,10,\*</sup> Alexander J. Cowan,<sup>2,\*</sup> Sung-Fu Hung,<sup>3,\*</sup> Jien-Wei Yeh,<sup>7,11,\*</sup> and Tung-Han Yang<sup>1,\*</sup>

<sup>1</sup>Department of Chemical Engineering, National Tsing Hua University, Hsinchu 30013, Taiwan.

<sup>2</sup>Stephenson Institute for Renewable Energy and Department of Chemistry, University of Liverpool, Liverpool L69 7ZF, United Kingdom.

<sup>3</sup>Department of Applied Chemistry, National Yang Ming Chiao Tung University, Hsinchu 30013, Taiwan.

<sup>4</sup>Department of Engineering and System Science, National Tsing Hua University, Hsinchu 30013, Taiwan.

<sup>5</sup>The University of Da Nang, University of Science and Technology, 54 Nguyen Luong Bang, Danang 550000, Vietnam.

<sup>6</sup>Instrumentation Center, National Tsing Hua University, Hsinchu 30013, Taiwan.

<sup>7</sup>Department of Materials Science and Engineering, National Tsing Hua University, Hsinchu 30013, Taiwan.

<sup>8</sup>National Synchrotron Radiation Research Center, Hsinchu 300, Taiwan.

<sup>9</sup>Department of Nanoscience and Biomedical Engineering, South Dakota School of Mines and Technology, Rapid City, South Dakota 57701, United States.

<sup>10</sup>College of Semiconductor Research, National Tsing Hua University, Hsinchu 30013, Taiwan.

<sup>11</sup>High Entropy Materials Center, National Tsing Hua University, Hsinchu 30013, Taiwan.

\*Corresponding author. Email: tunghanyang@mx.nthu.edu.tw; jwyeh@mx.nthu.edu.tw; sungfuhung@nycu.edu.tw; acowan@liverpool.ac.uk; hsinyi.tiffany.chen@gapp.nthu.edu.tw

The extended data include: Figures S1 to S30, Tables S1 to S9, and References

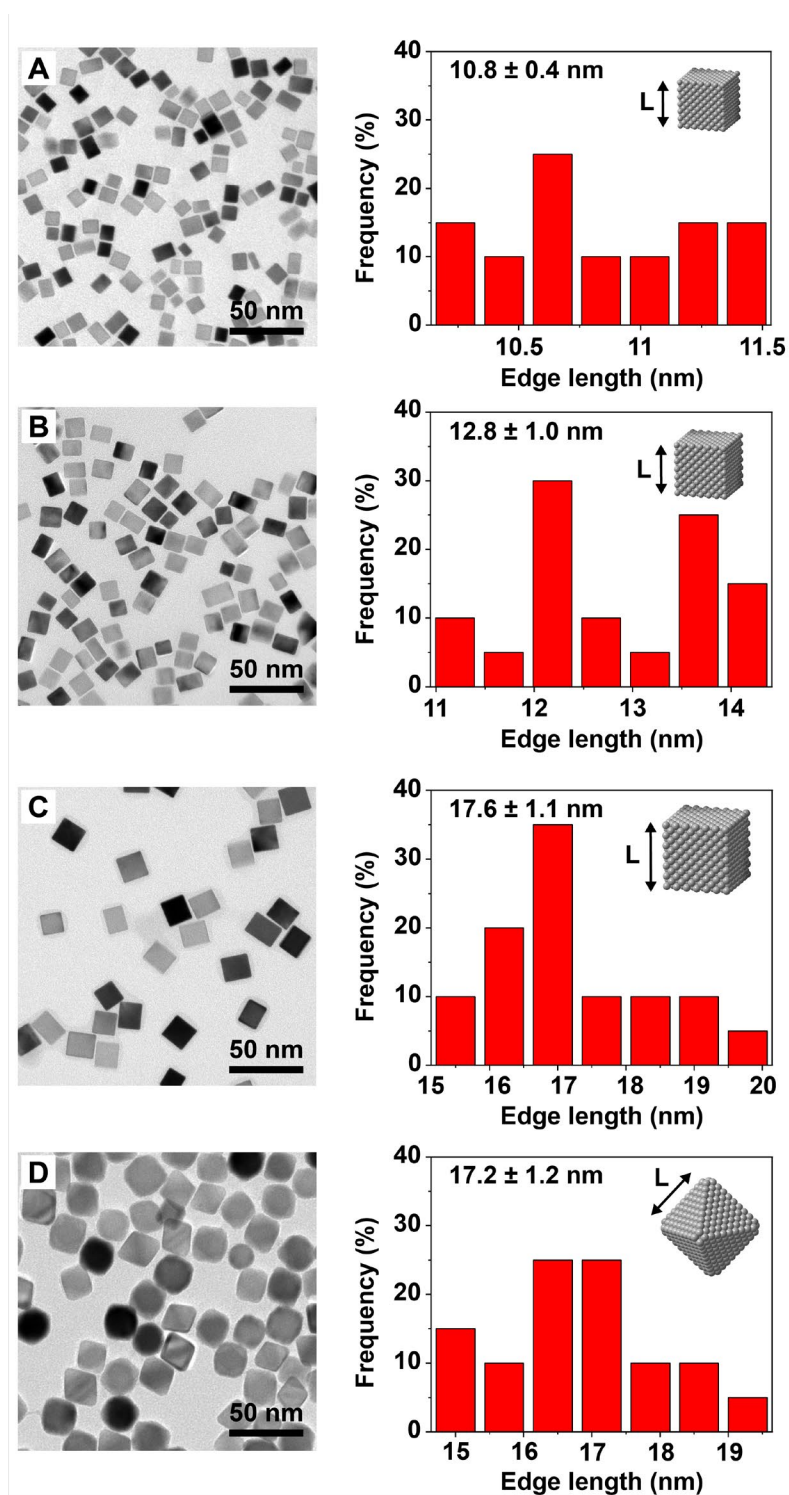

**Figure S1.** TEM images of Pd seeds and their edge length distributions. (A) 10.8-nm Pd cubic seeds. (B) 12.8-nm Pd cubic seeds. (C) 17.6-nm Pd cubic seeds. (D) 17.2-nm Pd octahedral seeds. Schematic illustrations in the figures showing particle size (L) was defined for a cube and octahedron.

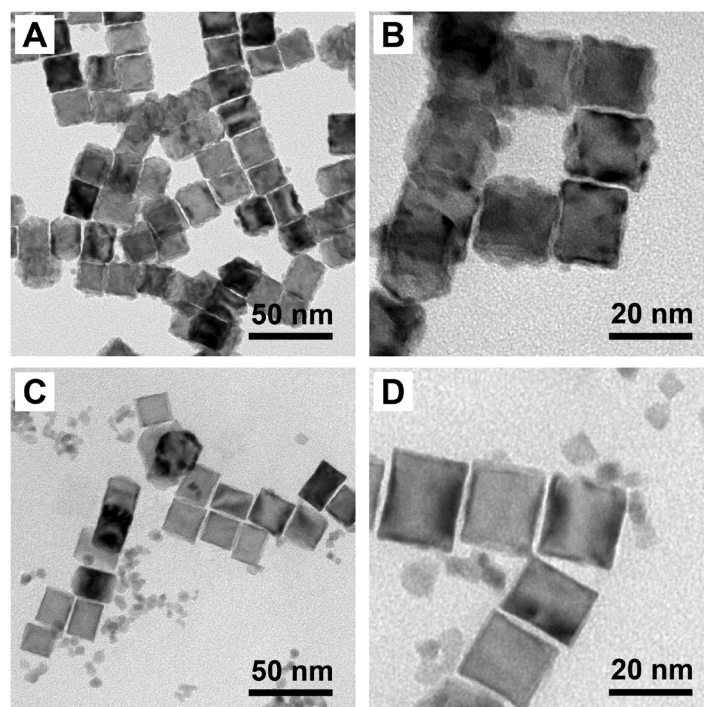

**Figure S2.** (A) Low and (B) high magnification TEM images of Pd@Pd<sub>0.2</sub>Pt<sub>0.2</sub>Ir<sub>0.2</sub>Ru<sub>0.2</sub>Rh<sub>0.2-4L</sub> core-shell nanocubes from the synthesis conducted at a lower reaction temperature of 180 °C, while keeping all other experimental parameters the same (concentration of each metal precursor equals to 0.042 μmol mL<sup>-1</sup>). It can be seen that the formation of islands randomly distributed on the Pd nanocubes, implying a higher reaction temperature of 195 °C is required to facilitate surface diffusion to obtain the conformal coating of HEA layers on the Pd cubic seeds. (C) Low and (D) high magnification TEM images of Pd@Pd<sub>0.2</sub>Pt<sub>0.2</sub>Ir<sub>0.2</sub>Ru<sub>0.2</sub>Rh<sub>0.2-4L</sub> core-shell nanocubes from the synthesis conducted at a faster injection rate of 3.2 mL h<sup>-1</sup>, while keeping all other experimental parameters the same. There were many tiny, self-nucleated nanoparticles, together with the core-shell cubic nanocrystals.

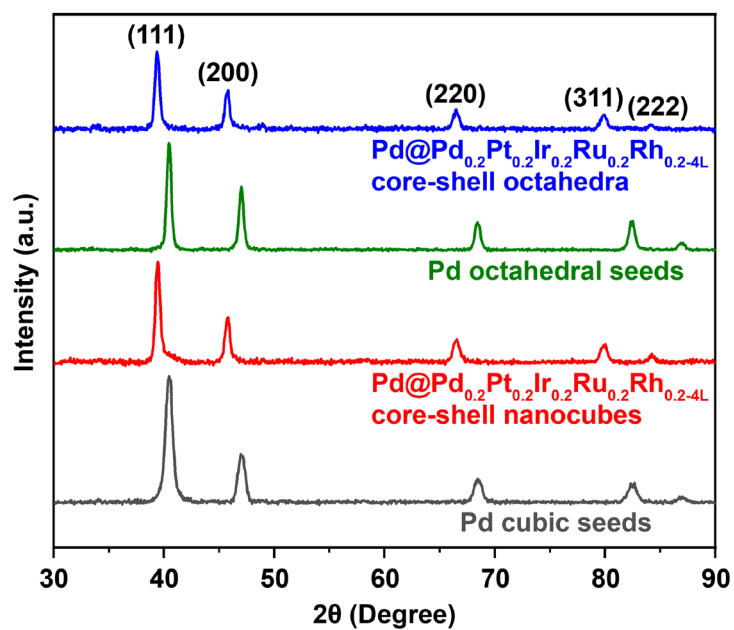

**Figure S3.** XRD patterns of Pd cubic and octahedral seeds, as well as the Pd@Pd<sub>0.2</sub>Pt<sub>0.2</sub>Ir<sub>0.2</sub>Ru<sub>0.2</sub>Rh<sub>0.2-4L</sub> core-shell nanocubes and octahedra. The patterns revealed that the Pd seeds and Pd@HEA nanocrystals all have a face-centered cubic (fcc) structure. The peak positions shifted after the deposition of HEA shells on the Pd seeds, together with a slight decrease in peak intensity.

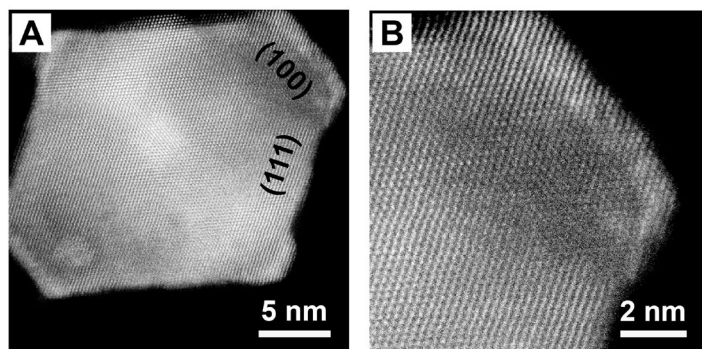

**Figure S4.** (A) Low and (B) high magnification HAADF-STEM images of Pd@Pd<sub>0.2</sub>Pt<sub>0.2</sub>Ir<sub>0.2</sub>Ru<sub>0.2</sub>Rh<sub>0.2-4L</sub> core-shell octahedral nanocrystals sampled at the early stage of  $t = 10$  h from the synthesis conducted at 195 °C. It can be seen that more atomic layers of metal atoms were deposited on the {100} facets at the corner sites than the {111} facets at the side faces. This result could be attributed to the different surface free energies of {100} and {111} facets<sup>1</sup>.

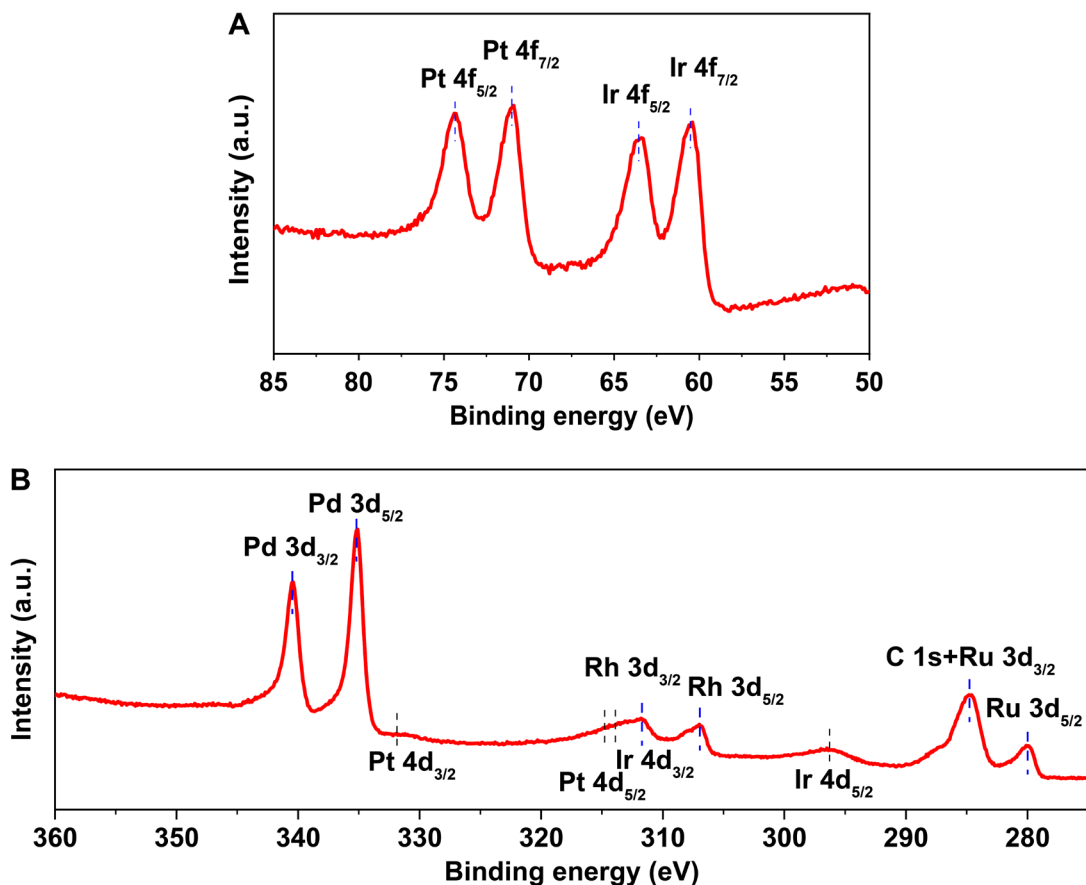

**Figure S5.** XPS analysis of Pd@Pd<sub>0.2</sub>Pt<sub>0.2</sub>Ir<sub>0.2</sub>Ru<sub>0.2</sub>Rh<sub>0.2-4L</sub> core-shell octahedral nanocrystals in the regions of (A) 50-85 eV and (B) 275-360 eV. In the binding energy region of 50-85 eV, the characteristic peaks of Ir 4f and Pt 4f doublets were observed. In the binding energy region of 275-360 eV, the 3d doublets from Ru, Rh, and Pd were resolved as the main peaks along with the weak Pt 4d and Ir 4d signals (black lines). The peak profiles and positions of these five elements in the XPS spectra were in line with their bulk metals, suggesting all elements were in the metallic state<sup>2</sup>.

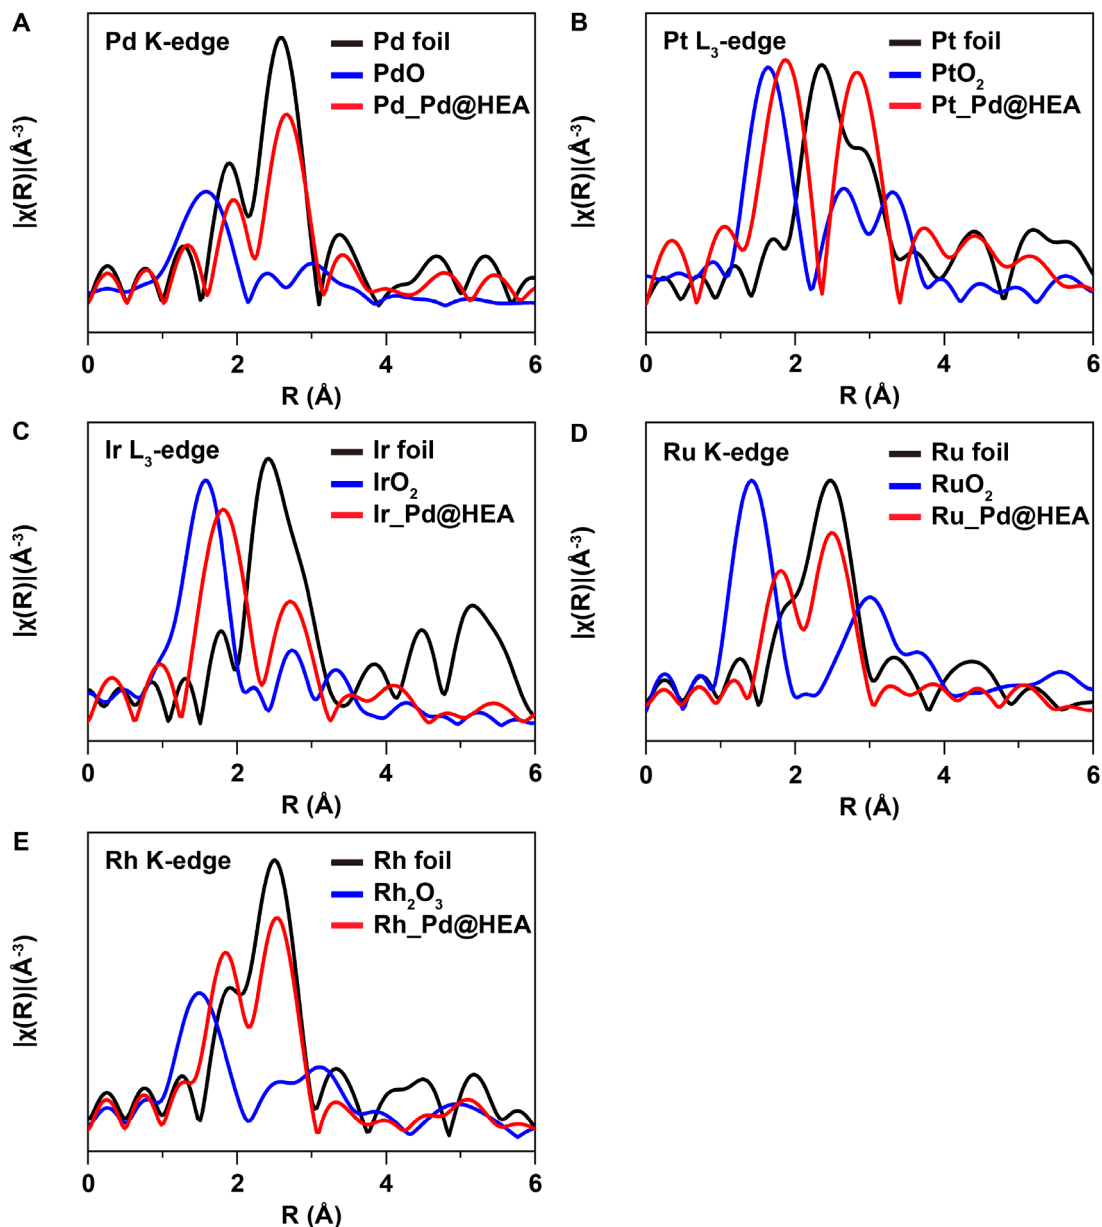

**Figure S6.** Fourier-transformed extended EXAFS spectra of Pd@Pd<sub>0.2</sub>Pt<sub>0.2</sub>Ir<sub>0.2</sub>Ru<sub>0.2</sub>Rh<sub>0.2-4L</sub> core-shell nanocubes and the corresponding metallic foil and oxidation state at the (A) Pd K-edge, (B) Pt L<sub>3</sub>-edge, (C) Ir L<sub>3</sub>-edge, (D) Ru K-edge, and (E) Rh K-edge. In these spectra, there were no significant peaks relating to metal-oxygen interaction (typically, the radial distance is around 1.5 Å), suggesting all elements existed in the metallic state rather than the oxidized form<sup>3,4</sup>. All the spectra for Pd@Pd<sub>0.2</sub>Pt<sub>0.2</sub>Ir<sub>0.2</sub>Ru<sub>0.2</sub>Rh<sub>0.2-4L</sub> core-shell nanocubes showed typical alloy doublet peaks positioning at Pd (1.96 Å, 2.67 Å), Pt (1.87 Å, 2.82 Å), Ir (1.81 Å, 2.72 Å), Ru (1.81 Å, 2.50 Å), and Rh (1.84 Å, 2.52 Å), respectively.

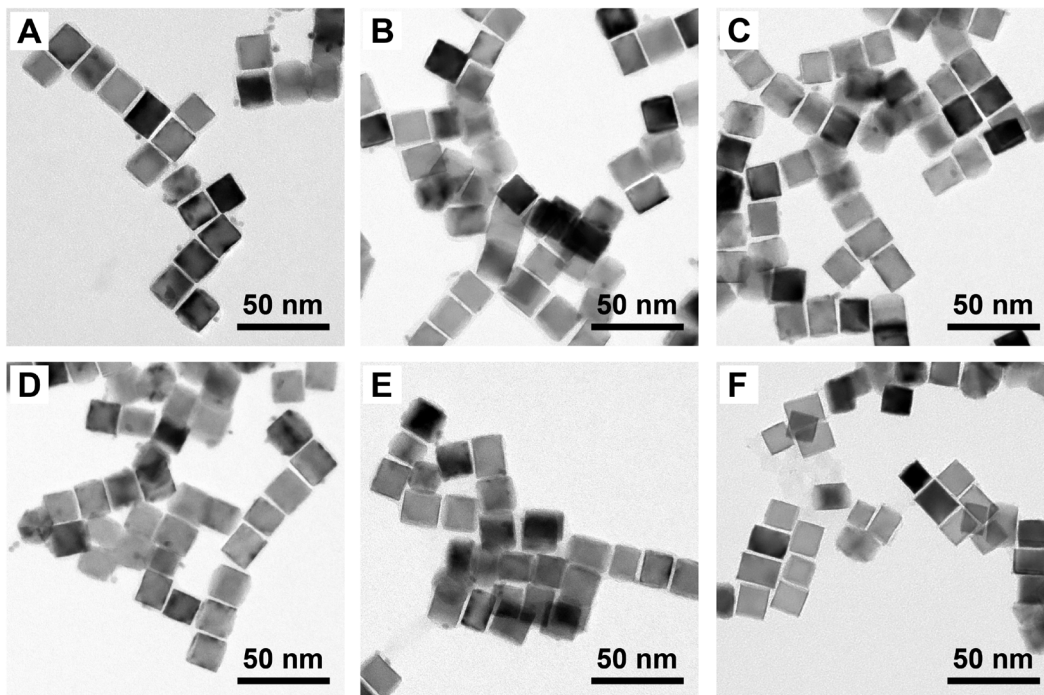

**Figure S7.** TEM images of six compositional stoichiometries of quinary Pd@PdPtIrRuRh core-shell cubic nanocrystals. These nanocrystals could be obtained by adjusting the ratios of metal precursors added into the synthesis under the standard procedures. (A) Pd@Pd<sub>0.225</sub>Pt<sub>0.1</sub>Ir<sub>0.225</sub>Ru<sub>0.225</sub>Rh<sub>0.225-4L</sub>, (B) Pd@Pd<sub>0.2</sub>Pt<sub>0.2</sub>Ir<sub>0.2</sub>Ru<sub>0.2</sub>Rh<sub>0.2-4L</sub>, (C) Pd@Pd<sub>0.175</sub>Pt<sub>0.3</sub>Ir<sub>0.175</sub>Ru<sub>0.175</sub>Rh<sub>0.175-4L</sub>, (D) Pd@Pd<sub>0.15</sub>Pt<sub>0.4</sub>Ir<sub>0.15</sub>Ru<sub>0.15</sub>Rh<sub>0.15-4L</sub>, (E) Pd@Pd<sub>0.125</sub>Pt<sub>0.5</sub>Ir<sub>0.125</sub>Ru<sub>0.125</sub>Rh<sub>0.125-4L</sub>, and (F) Pd@Pd<sub>0.1</sub>Pt<sub>0.6</sub>Ir<sub>0.1</sub>Ru<sub>0.1</sub>Rh<sub>0.1-4L</sub> core-shell nanocubes.

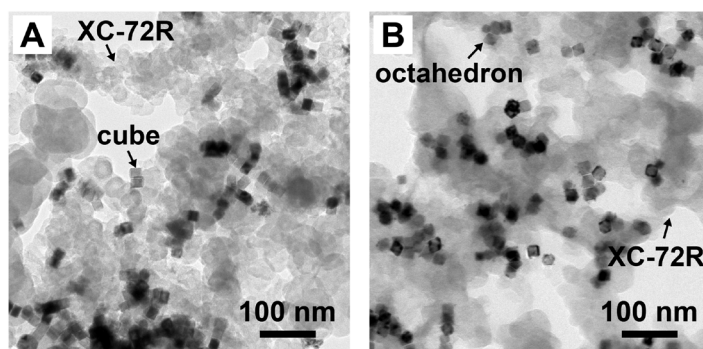

**Figure S8.** TEM images of Pd@Pd<sub>0.2</sub>Pt<sub>0.2</sub>Ir<sub>0.2</sub>Ru<sub>0.2</sub>Rh<sub>0.2-4L</sub> core-shell (A) nanocubes and (B) octahedra supported on the carbon black (Vulcan XC-72R). These observations suggest the uniform dispersion of Pd@HEA nanocrystals on the supports.

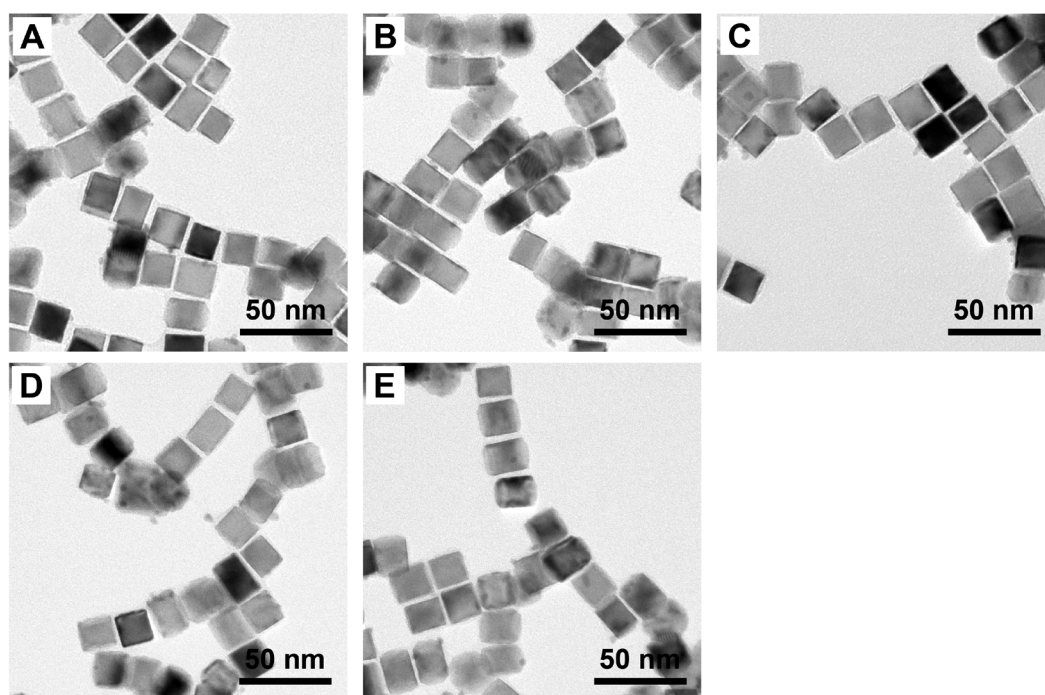

**Figure S9.** TEM images of (A) Pd@Pd, (B) Pd@Pt, (C) Pd@Ir, (D) Pd@Ru, and (E) Pd@Rh core-shell nanocubes.

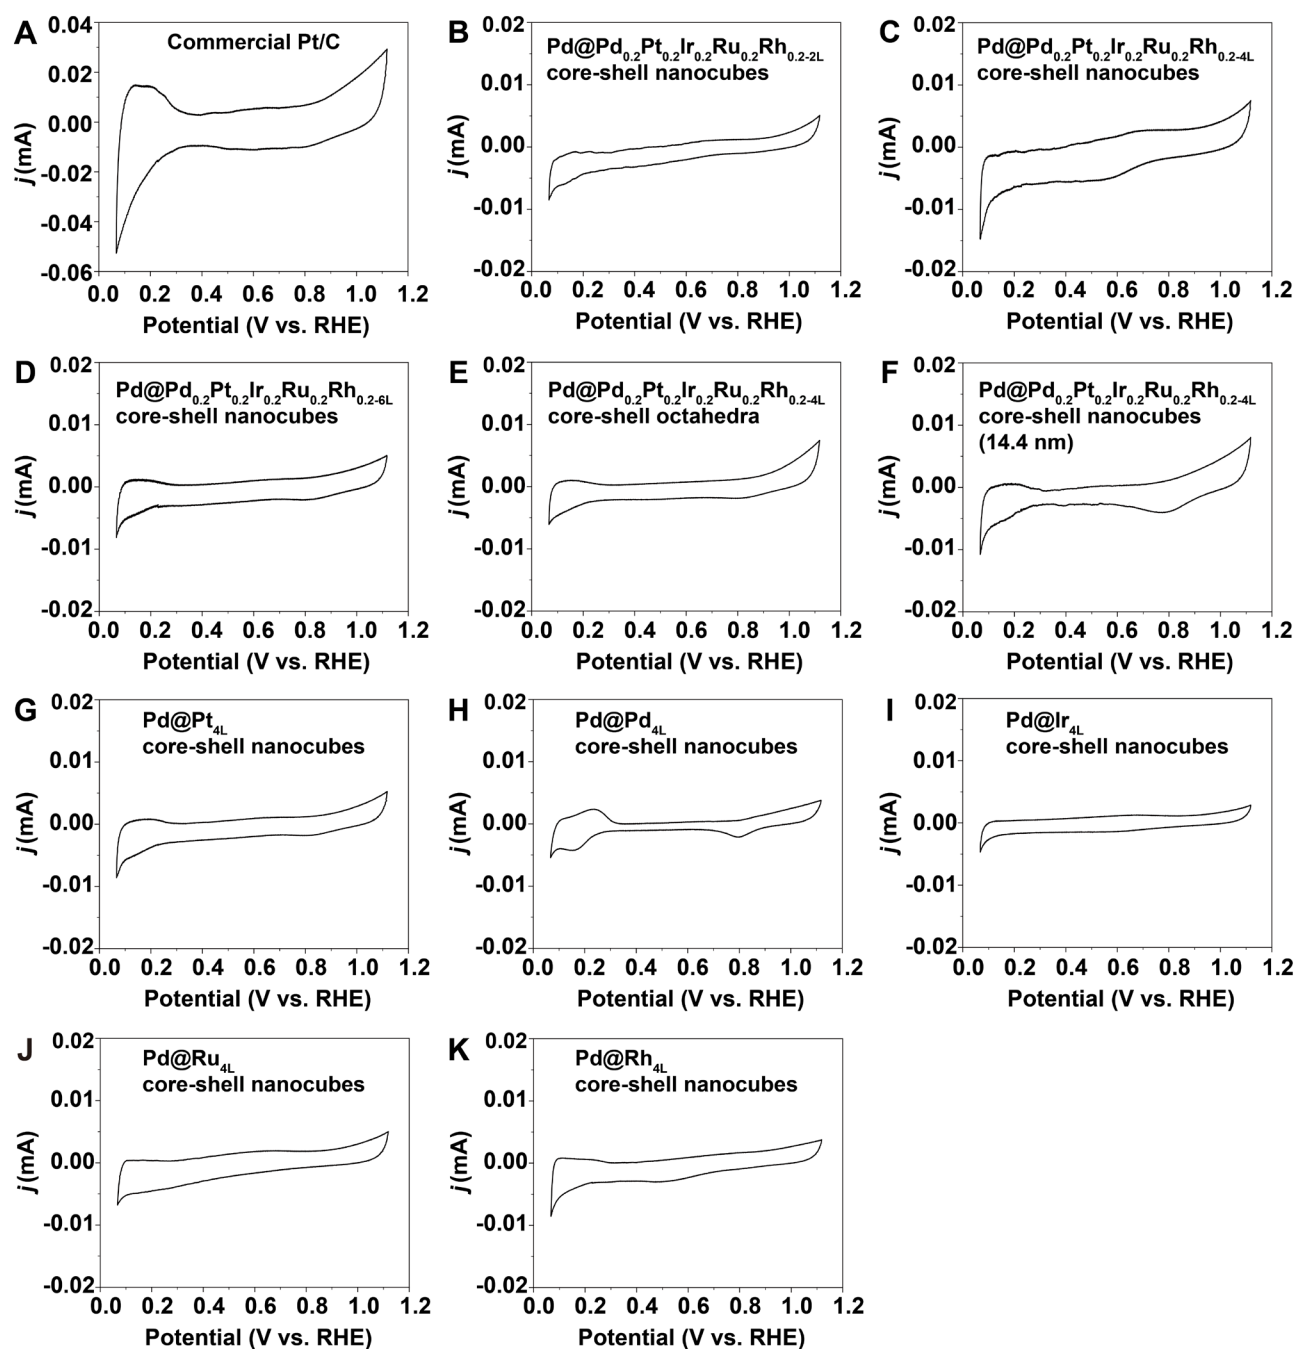

**Figure S10.** Cyclic voltammetry (CV) curves of Pd@Pd<sub>0.2</sub>Pt<sub>0.2</sub>Ir<sub>0.2</sub>Ru<sub>0.2</sub>Rh<sub>0.2-nL</sub> core-shell nanocubes and octahedra, commercial Pt/C, and monometallic samples. The ECSA could be calculated *via* the hydrogen absorption-desorption regions of the corresponding CV curves from 0.05 to 0.40 V.

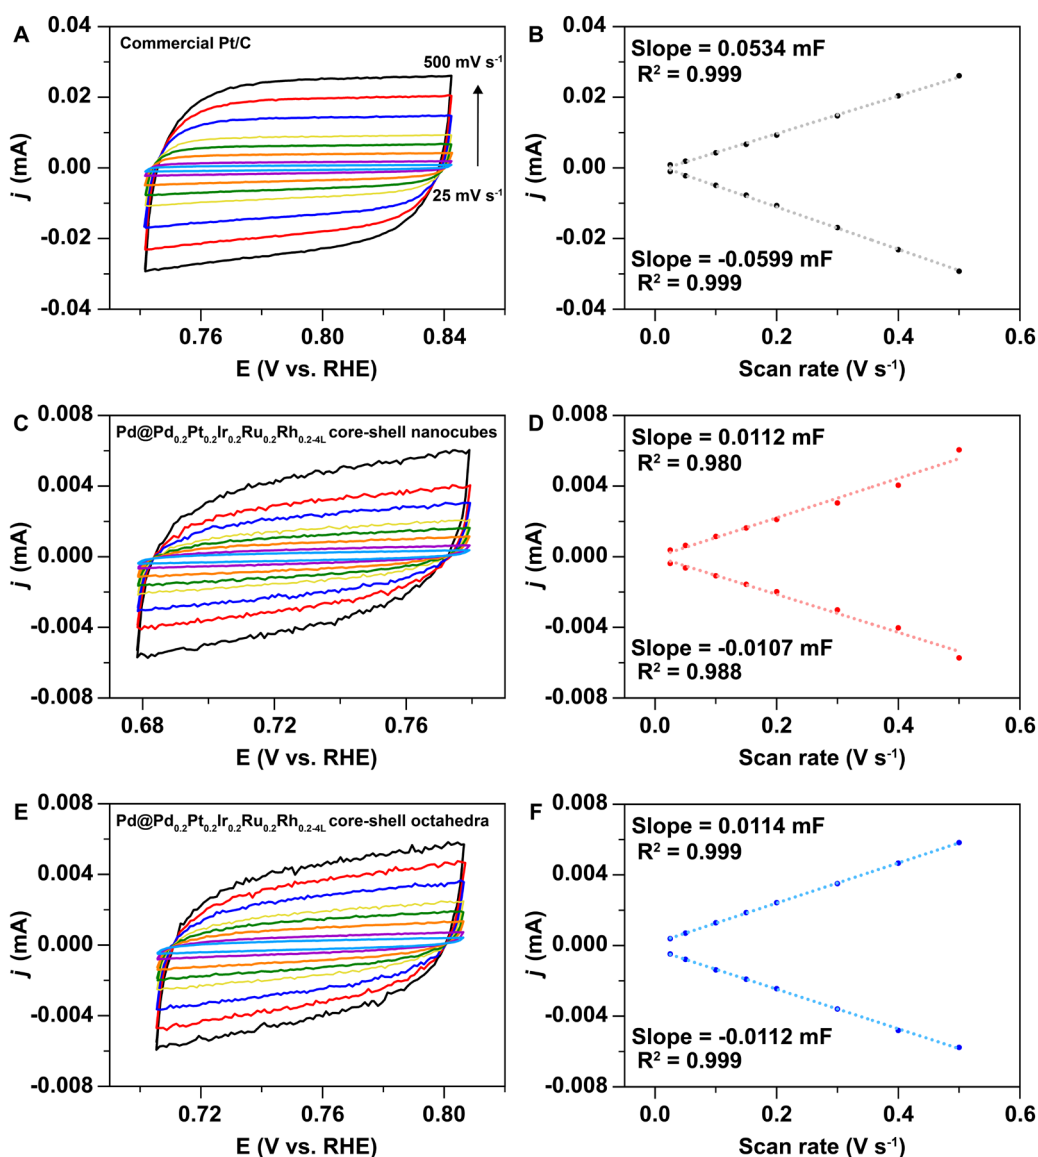

**Figure S11.** Cyclic voltammograms analysis for determining the double-layer capacitance. CV curves at the scan rate from  $25 \text{ mV s}^{-1}$  to  $500 \text{ mV s}^{-1}$  and the anodic and cathodic current distribution as a function of scan rate for commercial Pt/C (A, B), Pd@Pd<sub>0.2</sub>Pt<sub>0.2</sub>Ir<sub>0.2</sub>Ru<sub>0.2</sub>Rh<sub>0.2-4L</sub> core-shell nanocubes (C, D), and Pd@Pd<sub>0.2</sub>Pt<sub>0.2</sub>Ir<sub>0.2</sub>Ru<sub>0.2</sub>Rh<sub>0.2-4L</sub> core-shell octahedra (E, F). The ECSA for the catalysts was linearly proportional to the values of  $C_{dl}$  ( $ECSA = C_{dl}/C_s$ ,  $C_s$  is specific capacitance)<sup>5</sup>. In this work, the relationship of  $C_{dl}$  between commercial Pt/C (0.0566 mF), Pd@Pd<sub>0.2</sub>Pt<sub>0.2</sub>Ir<sub>0.2</sub>Ru<sub>0.2</sub>Rh<sub>0.2-4L</sub> core-shell nanocubes (0.0109 mF), and Pd@Pd<sub>0.2</sub>Pt<sub>0.2</sub>Ir<sub>0.2</sub>Ru<sub>0.2</sub>Rh<sub>0.2-4L</sub> core-shell octahedra (0.0113 mF) was positively correlated to the ECSA derived from the hydrogen underpotential deposition method, where the ECSA were  $29.13 \text{ m}^2 \text{ g}^{-1}$ ,  $3.78 \text{ m}^2 \text{ g}^{-1}$ , and  $4.57 \text{ m}^2 \text{ g}^{-1}$ , respectively.

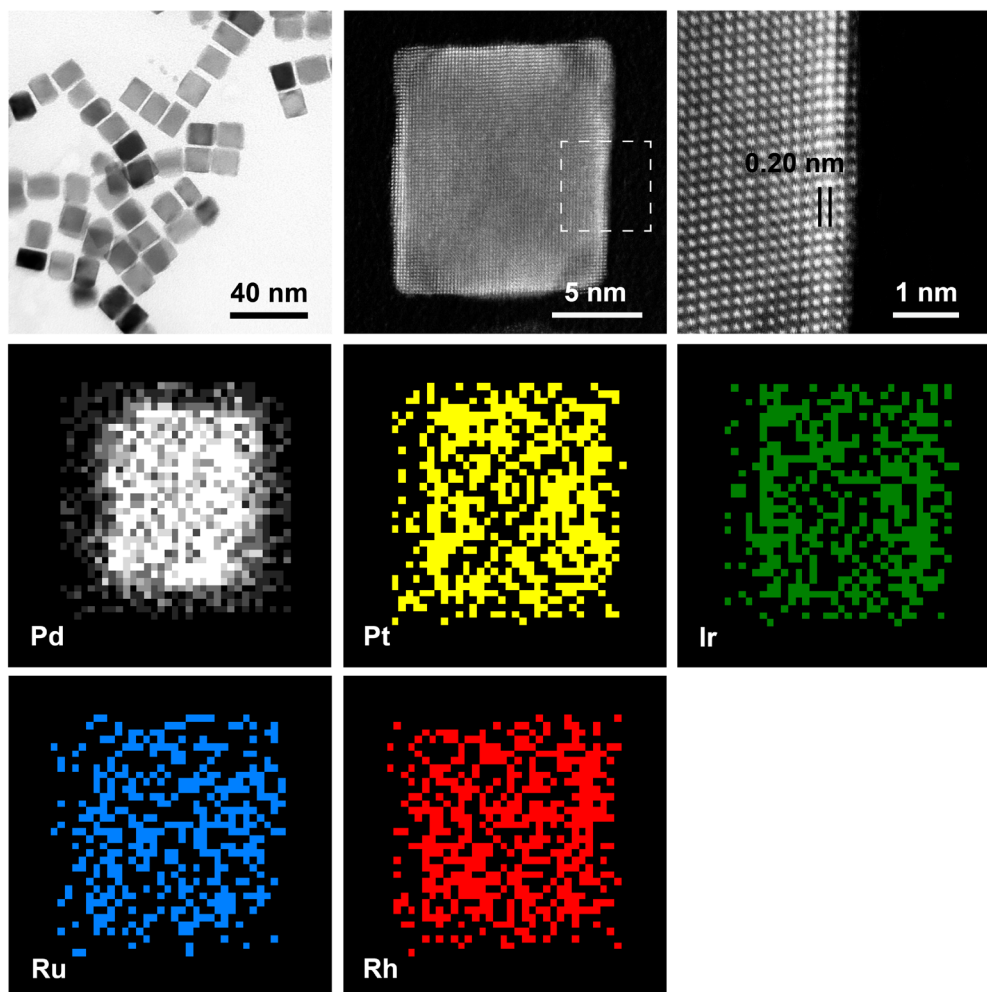

**Figure S12.** TEM, HAADF-STEM images, and EDS maps of Pd@Pd<sub>0.2</sub>Pt<sub>0.2</sub>Ir<sub>0.2</sub>Ru<sub>0.2</sub>Rh<sub>0.2-4L</sub> core-shell nanocubes (14.4 nm). From the atomic-resolution HAADF-STEM image, the number of Pd@Pd<sub>0.2</sub>Pt<sub>0.2</sub>Ir<sub>0.2</sub>Ru<sub>0.2</sub>Rh<sub>0.2</sub> atomic layers with a lattice spacing of around 0.20 nm along the [100] direction was estimated to be 4. Additionally, the EDS maps showed all the deposited elements were uniformly distributed throughout the entire HEA shell.

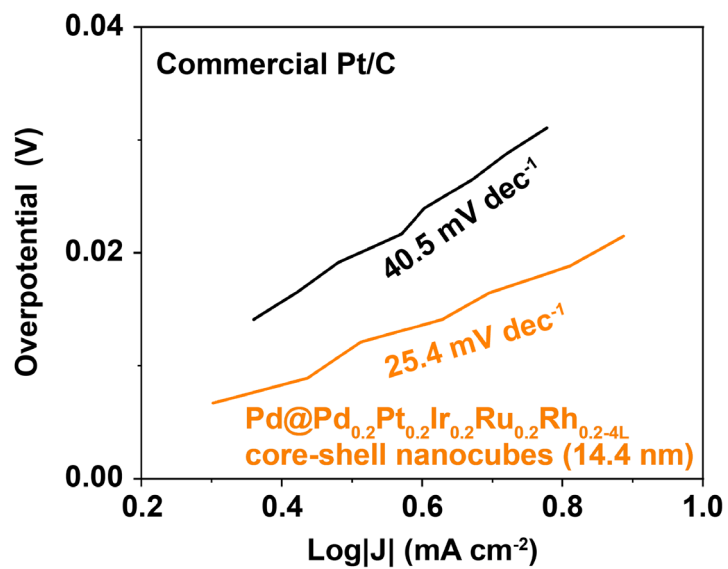

**Figure S13.** Tafel plots of Pd@Pd<sub>0.2</sub>Pt<sub>0.2</sub>Ir<sub>0.2</sub>Ru<sub>0.2</sub>Rh<sub>0.2-4L</sub> core-shell nanocubes (14.4 nm) and the commercial Pt/C samples. The analysis curves are derived from the HER polarization curves by replotting the overpotential versus the logarithm of the current density with a scan rate of 1 mV s<sup>-1</sup> measured in the acidic 0.5 M H<sub>2</sub>SO<sub>4</sub> electrolyte.

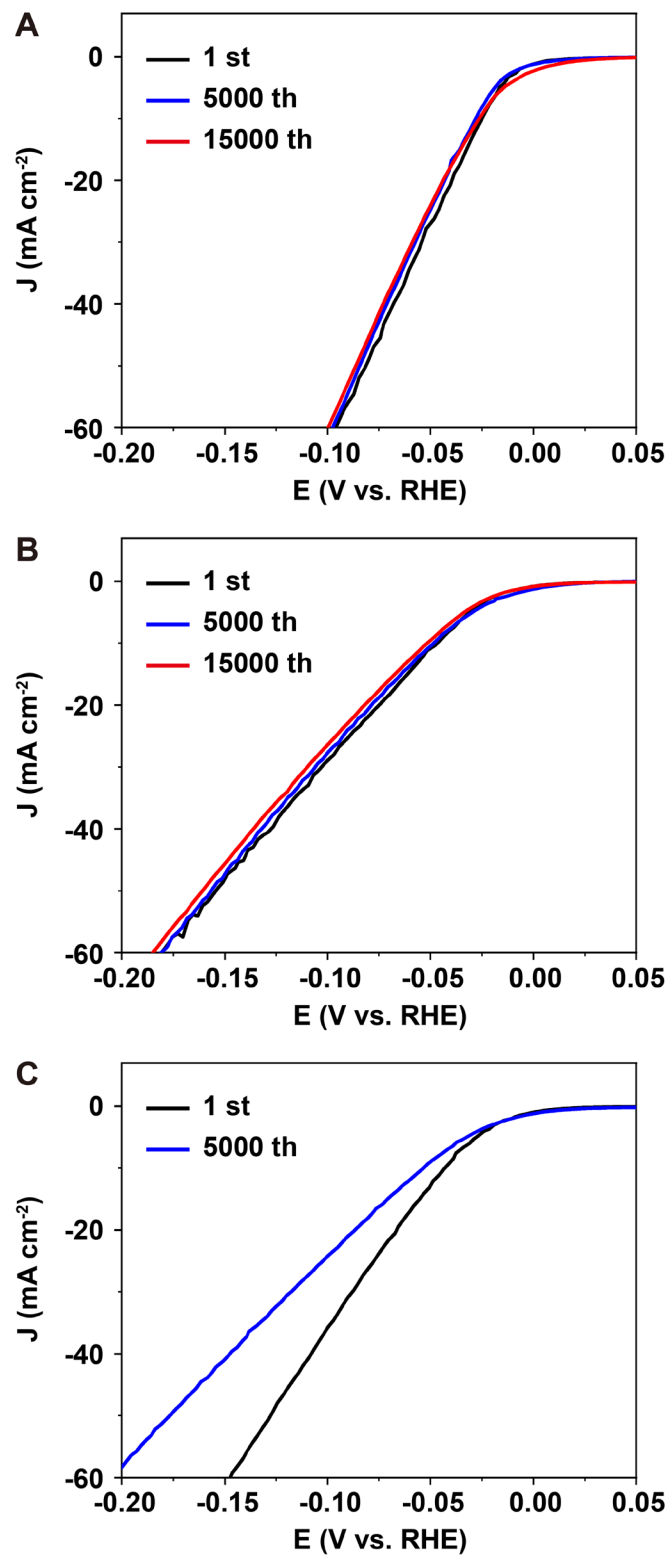

**Figure S14.** LSV curves before and after long-term durability tests of Pd@Pd<sub>0.2</sub>Pt<sub>0.2</sub>Ir<sub>0.2</sub>Ru<sub>0.2</sub>Rh<sub>0.2-4L</sub> core-shell (A) cubic (14.4 nm) and (B) octahedral nanocrystals as well as (C) the commercial Pt/C samples in the acidic 0.5 M H<sub>2</sub>SO<sub>4</sub> electrolyte for electrocatalytic HER.

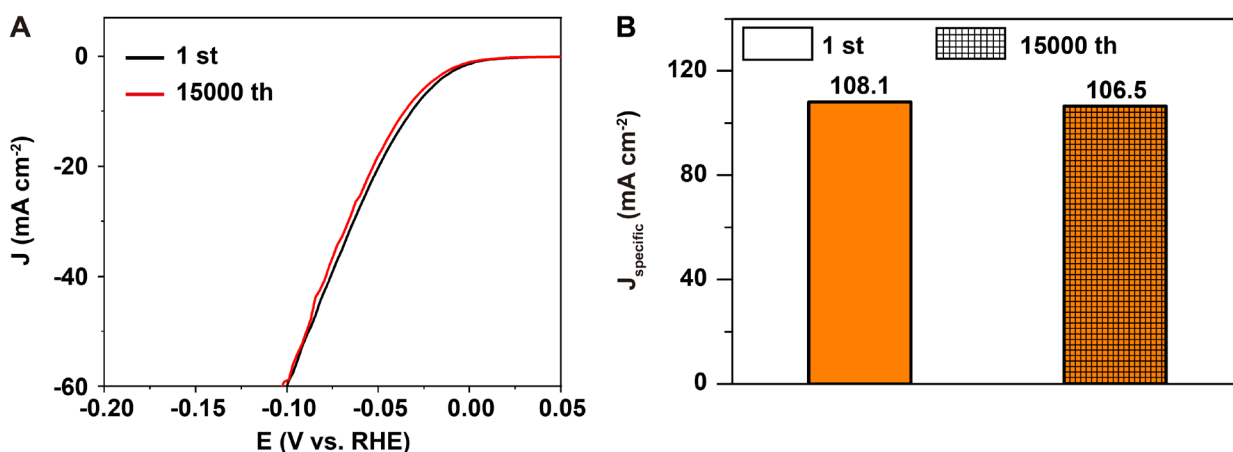

**Figure S15.** Long-term durability test for the representative Pd@Pd<sub>0.2</sub>Pt<sub>0.2</sub>Ir<sub>0.2</sub>Ru<sub>0.2</sub>Rh<sub>0.2-4L</sub> core-shell nanocubes (14.4 nm) using a graphite counter electrode in the acidic 0.5 M H<sub>2</sub>SO<sub>4</sub> electrolyte for electrocatalytic HER. (A) LSV curves and (B) specific activities at -0.1 V before and after 15000 catalytic cycles, showing excellent durability. The sample preparation and the measurement method are the same as the above-mentioned process in electrocatalytic measurements for HER, except that the counter electrode was changed to a graphite electrode instead of a platinum wire to avoid the possibility of Pt oxidation and redeposition on the working electrode.

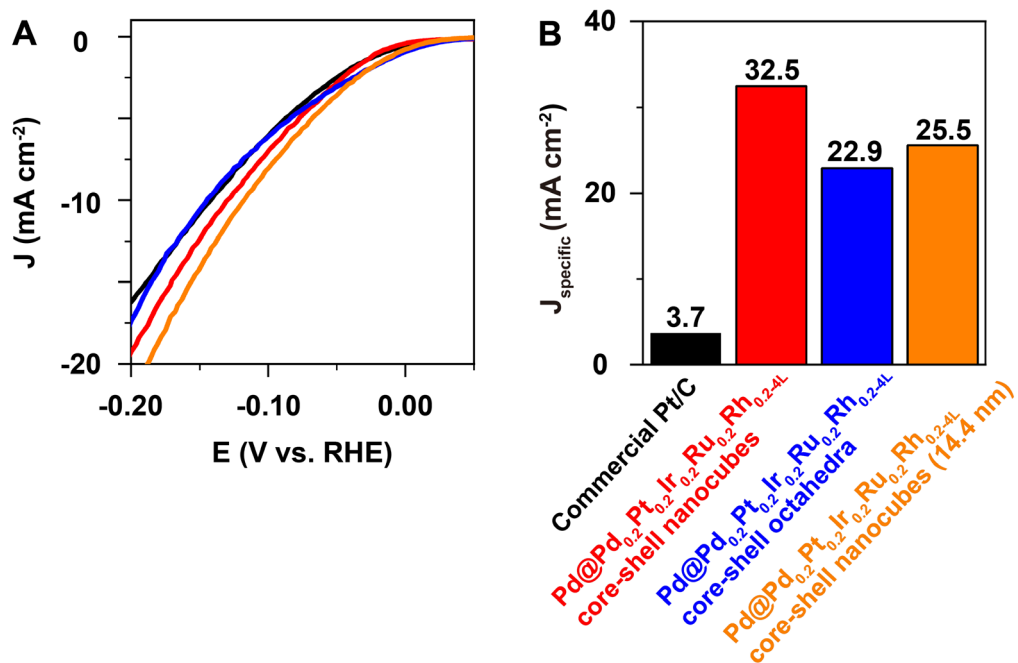

**Figure S16.** (A) LSV curves and (B) specific activities of Pd@Pd<sub>0.2</sub>Pt<sub>0.2</sub>Ir<sub>0.2</sub>Ru<sub>0.2</sub>Rh<sub>0.2-4L</sub> core-shell cubic and octahedral nanocrystals, and Pd@Pd<sub>0.2</sub>Pt<sub>0.2</sub>Ir<sub>0.2</sub>Ru<sub>0.2</sub>Rh<sub>0.2-4L</sub> core-shell cubic nanocrystals (14.4 nm), as well as the commercial Pt/C samples at -0.15 V versus RHE in the alkaline 1.0 M KOH electrolyte for electrocatalytic HER.

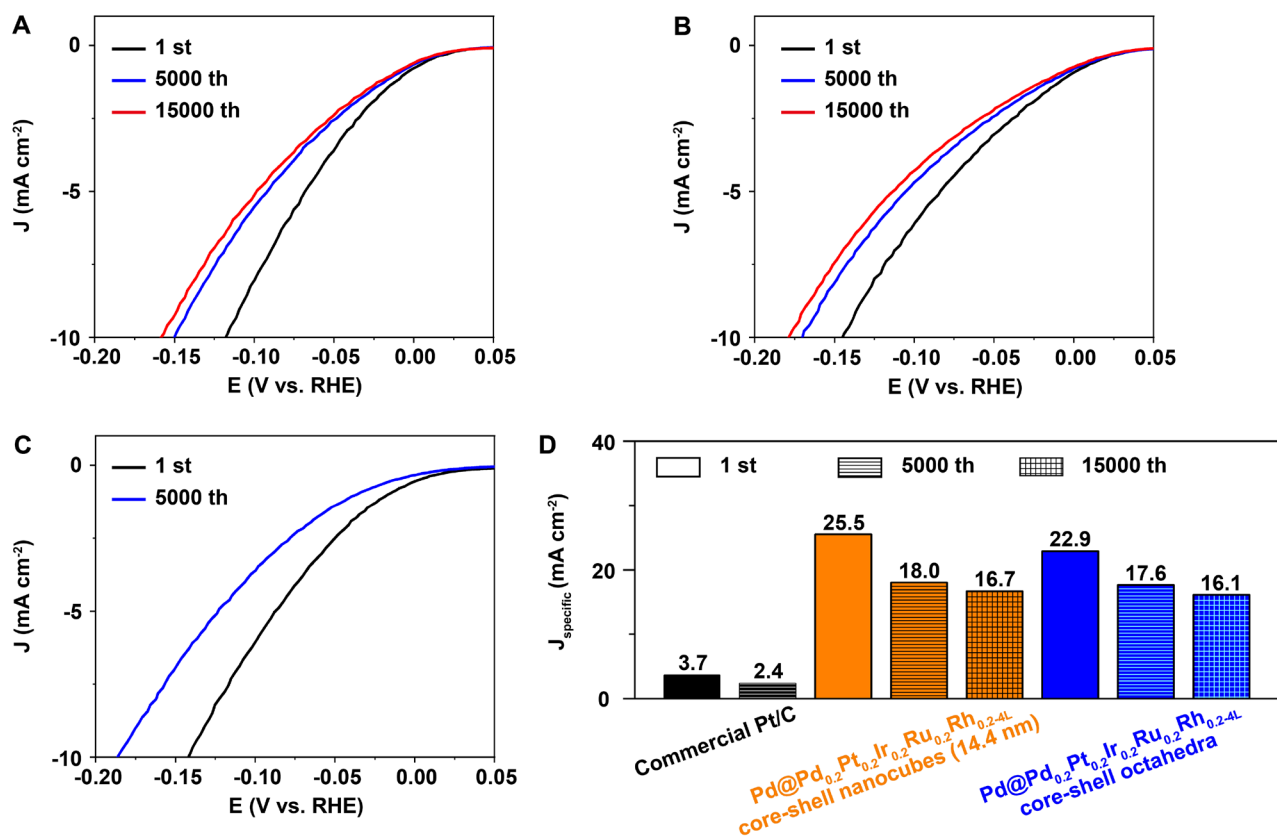

**Figure S17.** LSV curves before and after long-term durability tests of Pd@Pd<sub>0.2</sub>Pt<sub>0.2</sub>Ir<sub>0.2</sub>Ru<sub>0.2</sub>Rh<sub>0.2-4L</sub> core-shell (A) cubic (14.4 nm) and (B) octahedral nanocrystals as well as (C) the commercial Pt/C samples in the alkaline 1.0 M KOH electrolyte for electrocatalytic HER. (D) Comparisons of the specific activities at -0.15 V of these three catalysts at different cycles.

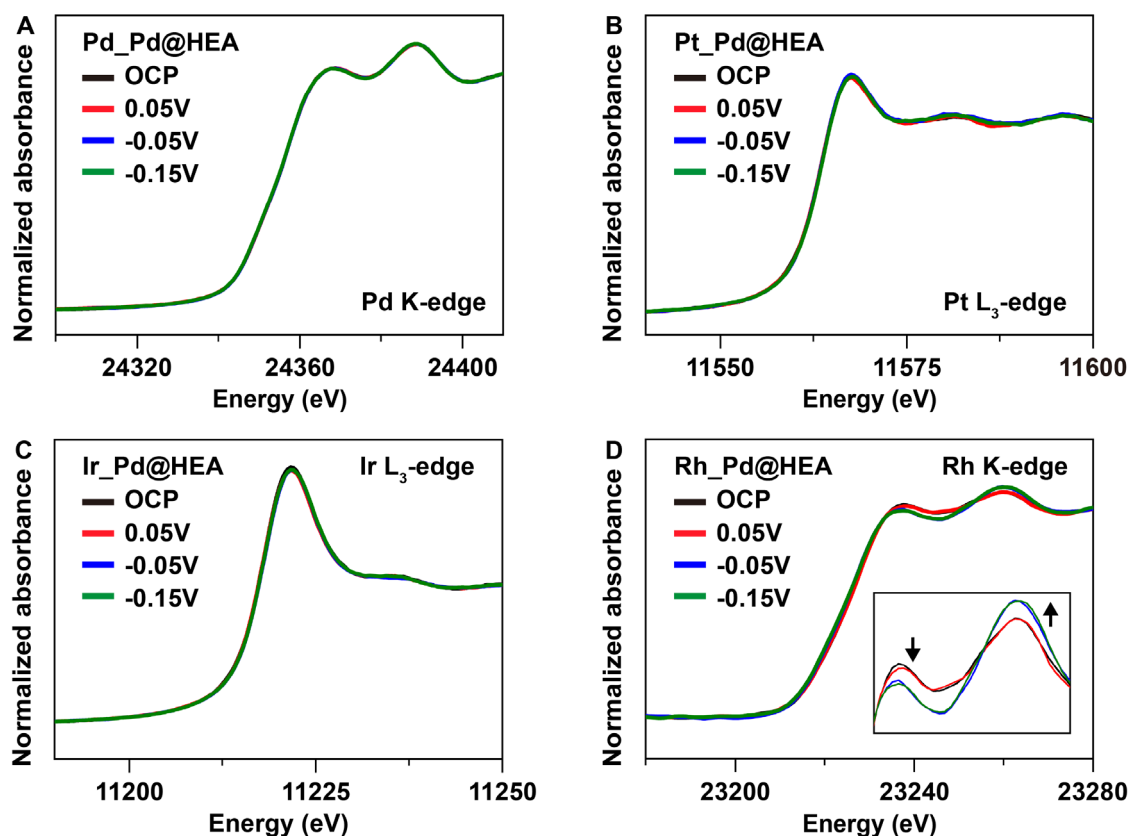

**Figure S18.** *In situ* XANES spectra of Pd@Pd<sub>0.2</sub>Pt<sub>0.2</sub>Ir<sub>0.2</sub>Ru<sub>0.2</sub>Rh<sub>0.2-4L</sub> core-shell nanocubes at the (A) Pd K-edge, (B) Pt L<sub>3</sub>-edge, (C) Ir L<sub>3</sub>-edge, and (D) Rh K-edge under initial condition and different applied potentials. For Rh K-edge, when the voltage shifted from cathodic to anodic, the intensity of peak at around 23237 and 23260 eV decreased and increased dramatically along with the slight shift of the absorption edge, indicating that a part of hydrogen adsorption occurred on Rh sites. Note that the spectra of Pd K-edge, Pt L<sub>3</sub>-edge, and Ir L<sub>3</sub>-edge for Pd@Pd<sub>0.2</sub>Pt<sub>0.2</sub>Ir<sub>0.2</sub>Ru<sub>0.2</sub>Rh<sub>0.2-4L</sub> core-shell nanocubes were nearly unmoved.

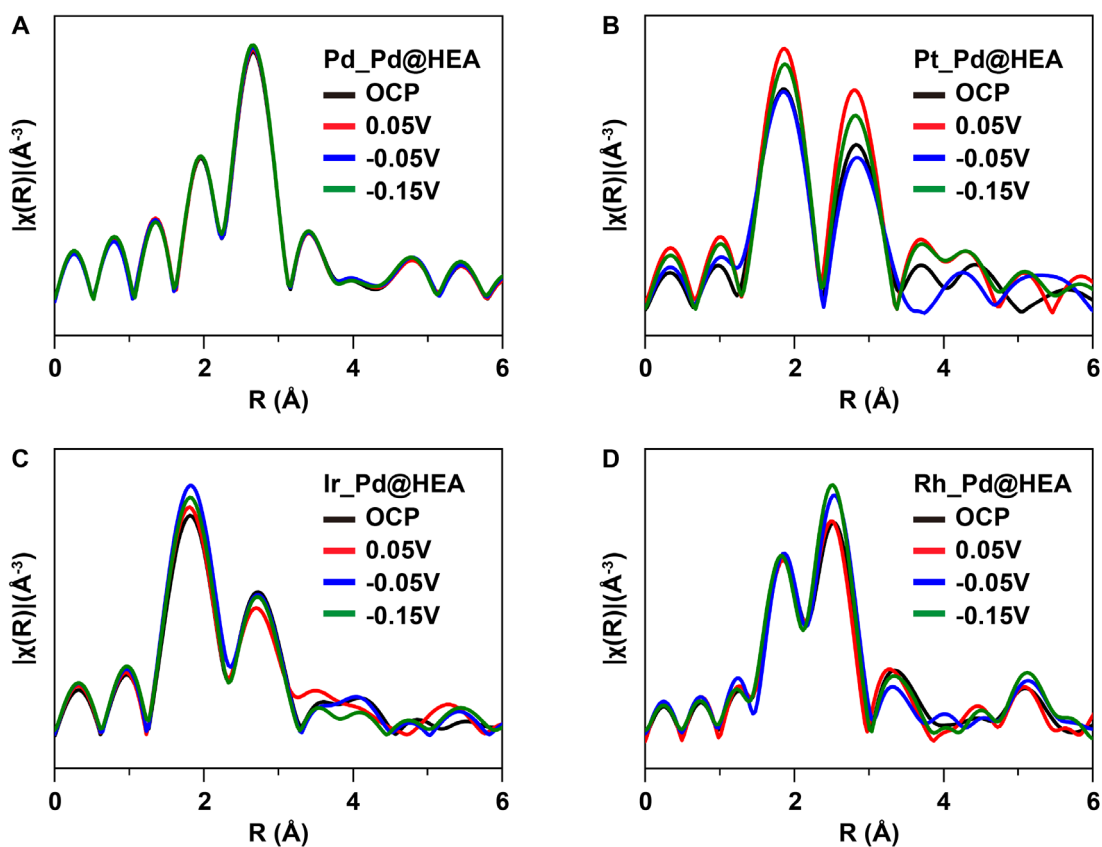

**Figure S19.** *In situ* FT-EXAFS spectra of Pd@Pd<sub>0.2</sub>Pt<sub>0.2</sub>Ir<sub>0.2</sub>Ru<sub>0.2</sub>Rh<sub>0.2-4L</sub> core-shell nanocubes at the (A) Pd K-edge, (B) Pt L<sub>3</sub>-edge, (C) Ir L<sub>3</sub>-edge, and (D) Rh K-edge. The average bond length for all elements in HEA remained nearly unchanged when applied to different voltages, indicating the bond structure (bond length and coordination number) did not change during the reaction. These results confirmed the structural stability of Pd@Pd<sub>0.2</sub>Pt<sub>0.2</sub>Ir<sub>0.2</sub>Ru<sub>0.2</sub>Rh<sub>0.2-4L</sub> core-shell nanocubes.

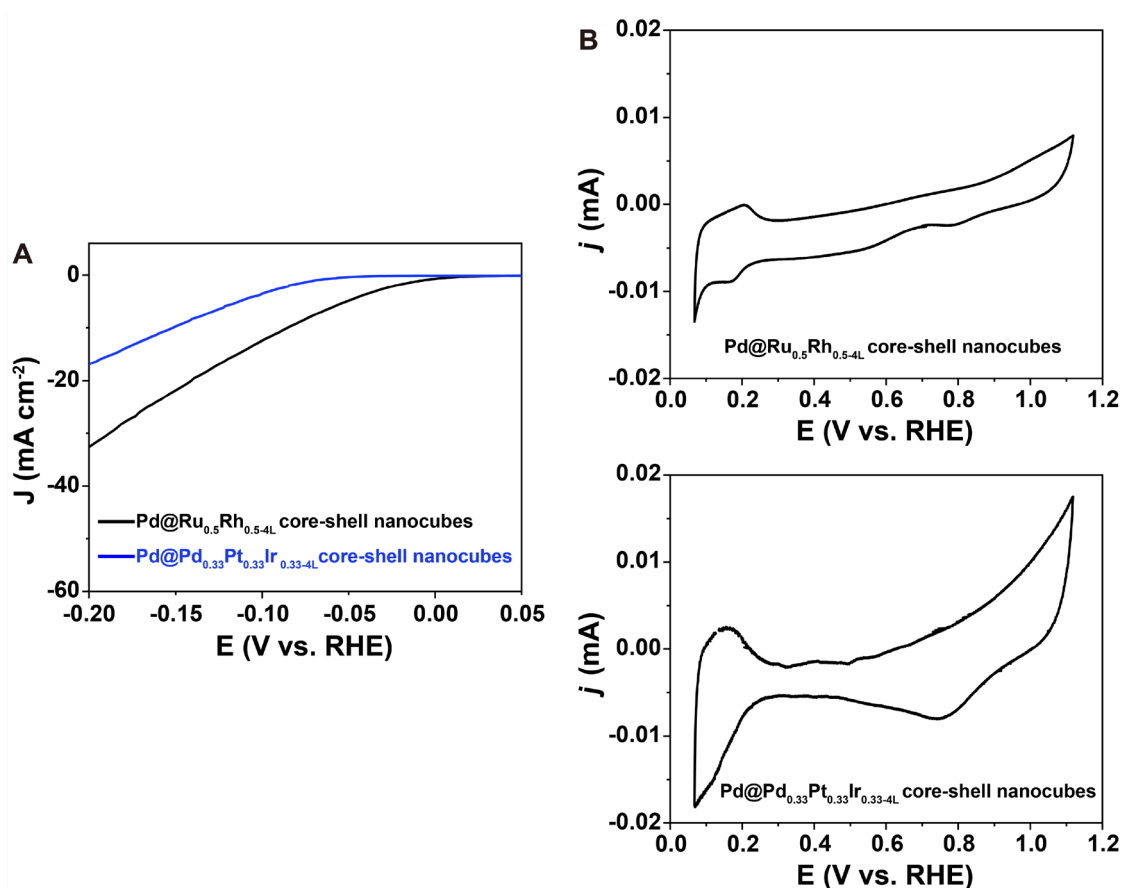

**Figure S20.** Electrocatalytic HER performances of bimetallic Pd@Ru<sub>0.5</sub>Rh<sub>0.5-4L</sub> and trimetallic Pd@Pd<sub>0.33</sub>Pt<sub>0.33</sub>Ir<sub>0.33-4L</sub> core-shell nanocubes in the 0.5 M H<sub>2</sub>SO<sub>4</sub> electrolyte. (A) LSV and (B) CV curves. Compared to the Pd@Pd<sub>0.2</sub>Pt<sub>0.2</sub>Ir<sub>0.2</sub>Ru<sub>0.2</sub>Rh<sub>0.2-4L</sub> core-shell nanocubes, the Pd@Ru<sub>0.5</sub>Rh<sub>0.5-4L</sub> and Pd@Pd<sub>0.33</sub>Pt<sub>0.33</sub>Ir<sub>0.33-4L</sub> core-shell nanocubes showed the current density of 12.4 and 3.6 mA cm<sup>-2</sup> at a specific overpotential of 0.1 V (where the current is normalized by geometric electrode area), respectively.

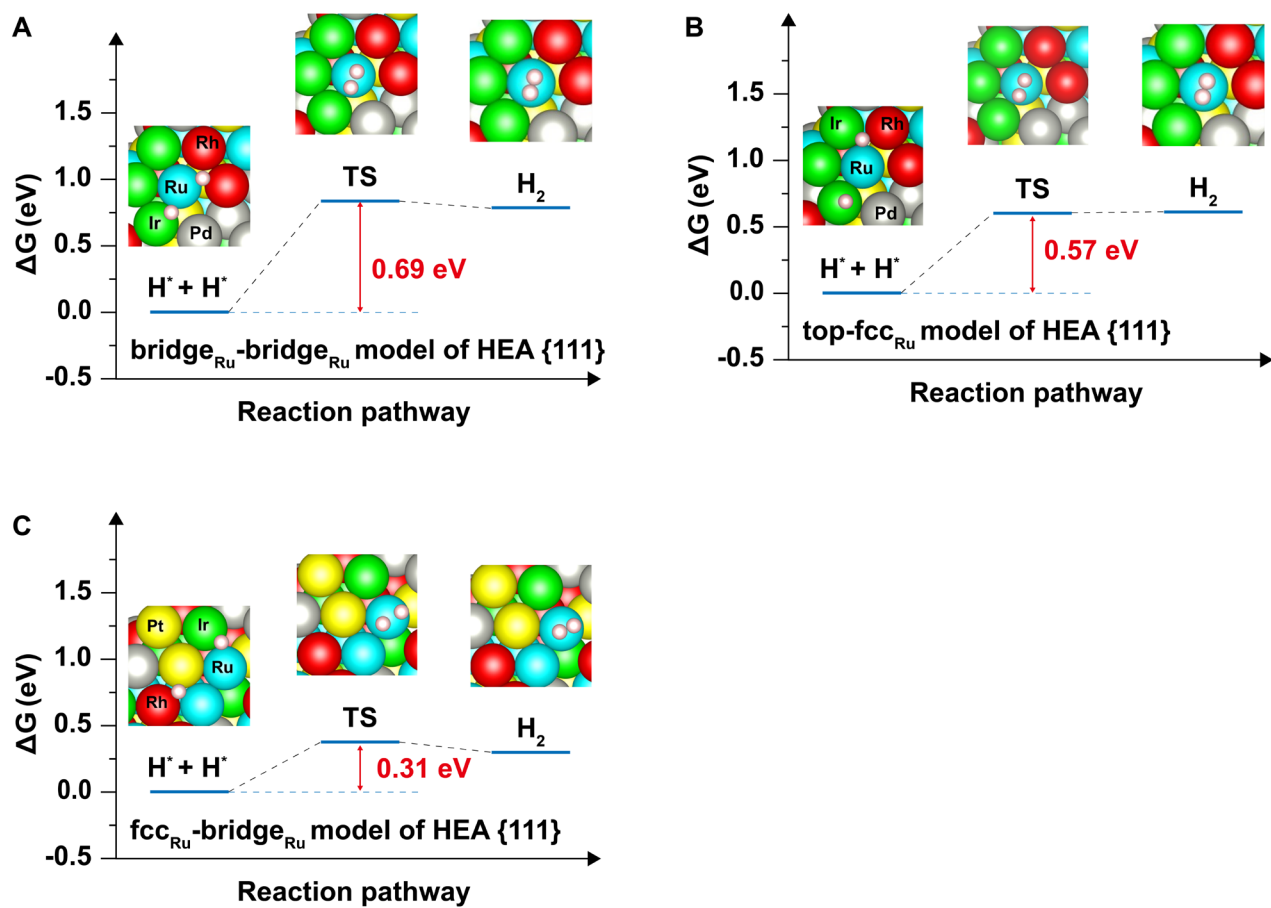

**Figure S21.** Free energy diagrams of the Tafel reaction paths on (A) bridge<sub>Ru</sub>-bridge<sub>Ru</sub>, (B) top-fcc<sub>Ru</sub>, and (C) fcc<sub>Ru</sub>-bridge<sub>Ru</sub> models of HEA {111} surface.

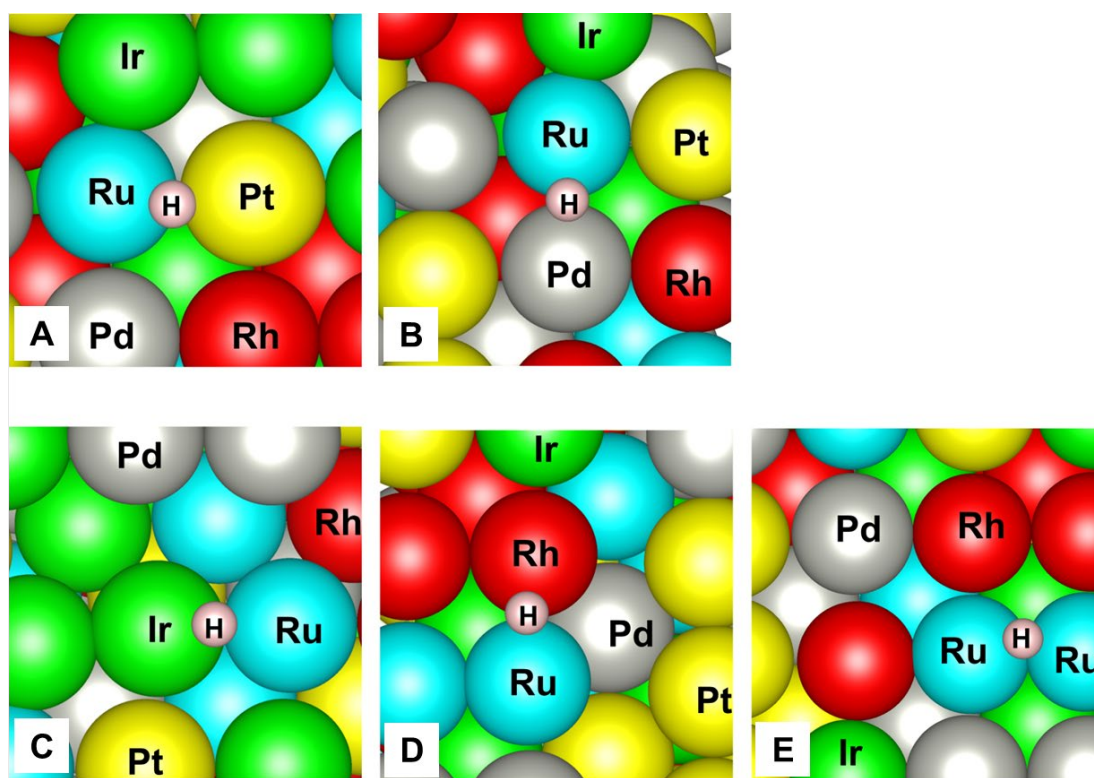

**Figure S22.** H adsorption on bridge<sub>Ru</sub> sites of HEA {100} surface. (A) Ru-Pt. (B) Ru-Pd. (C) Ru-Ir. (D) Ru-Rh. (E) Ru-Ru.

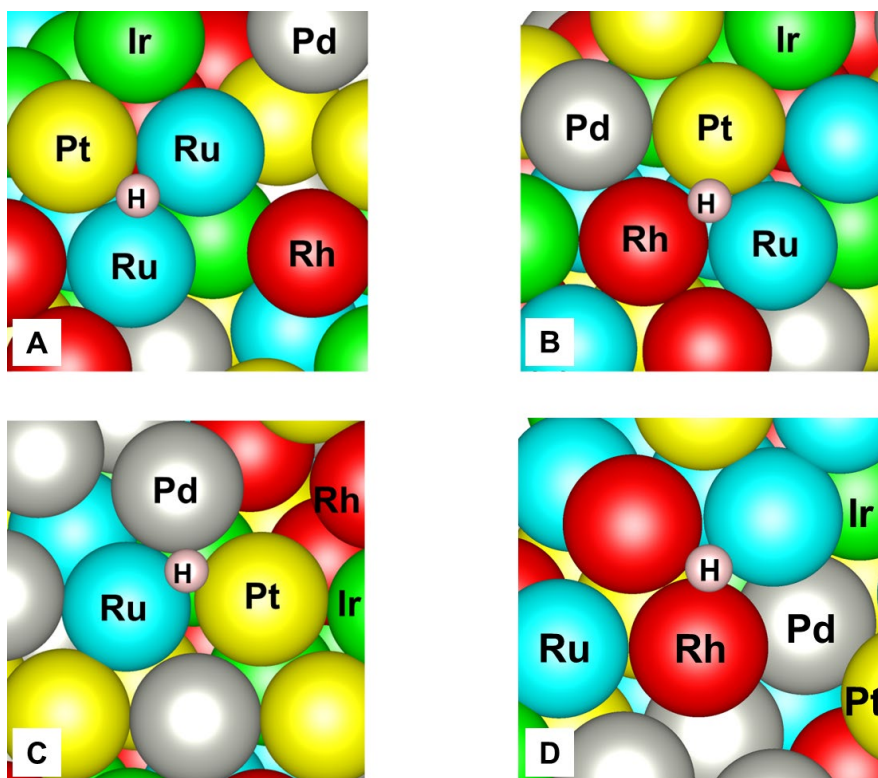

**Figure S23.** H adsorption on  $\text{fcc}_{\text{Ru}}$  sites of HEA  $\{111\}$  surface. (A) Pt-Ru-Ru. (B) Pt-Ru-Rh (C) Ru-Pt-Pd. (D) Ru-Rh-Rh.

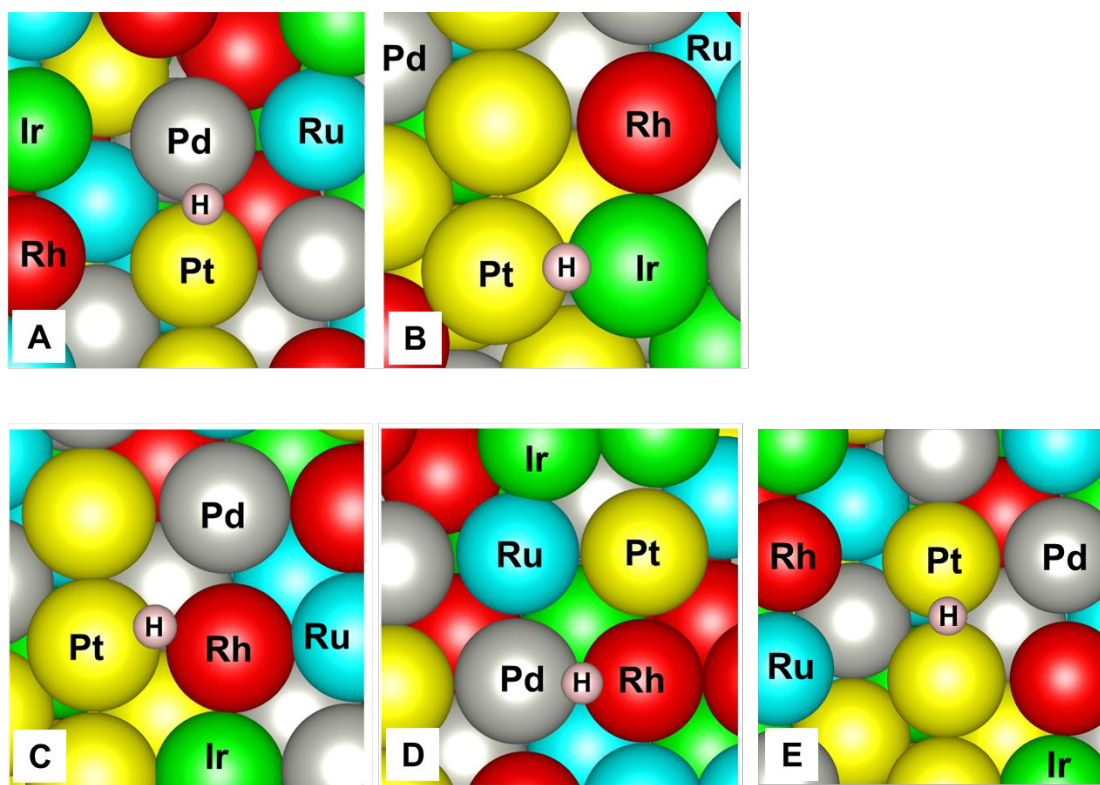

**Figure S24.** H adsorption on bridge sites of HEA {100} surface other than Ru sites. (A) Pt-Pd. (B) Pt-Ir. (C) Rh-Pt. (D) Pd-Rh. (E) Pt-Pt.

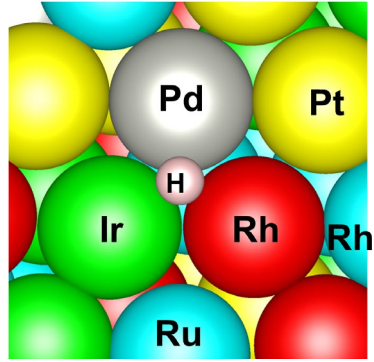

**Figure S25.** H adsorption on fcc sites of HEA {111} surface other than Ru sites (Ir-Pd-Rh).

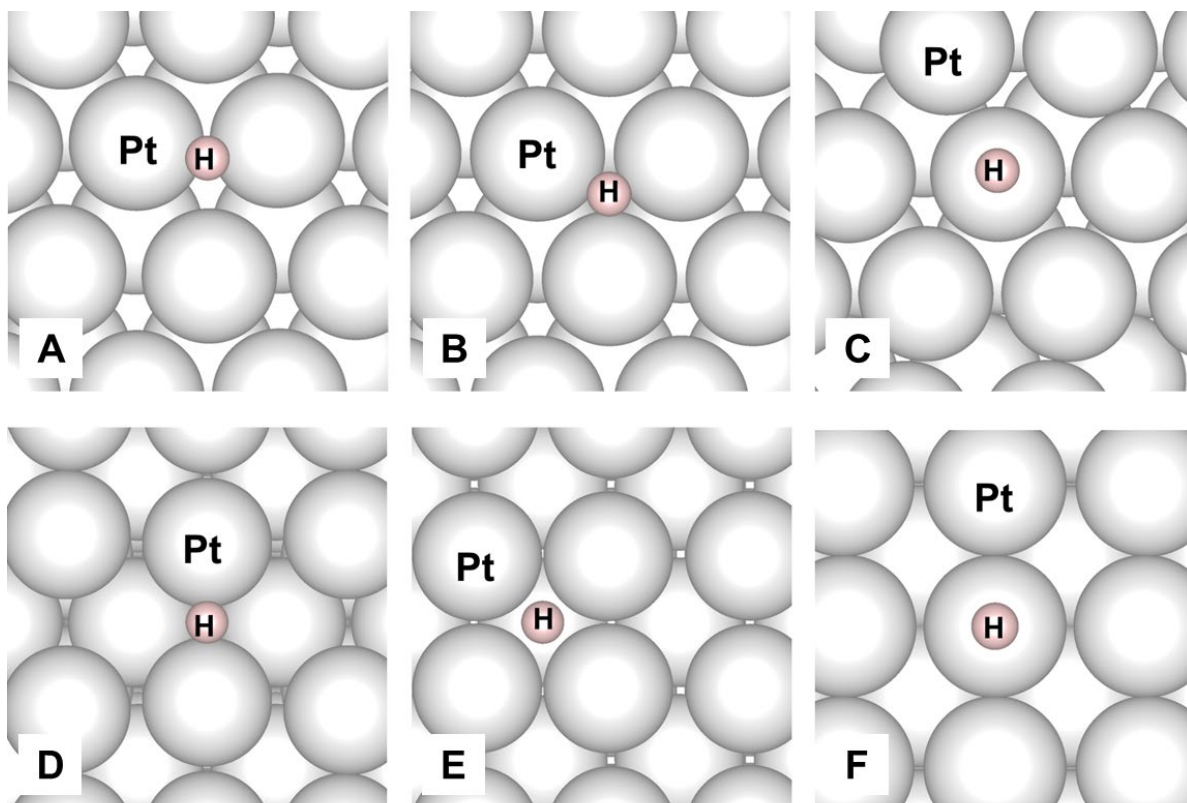

**Figure S26.** H adsorption on Pt surface. (A-C) H adsorption on (A) bridge, (B) fcc, and (C) top sites of Pt {111} surface. (D-F) H adsorption on (D) bridge, (E) hcp, and (F) top sites of Pt {100} surface.

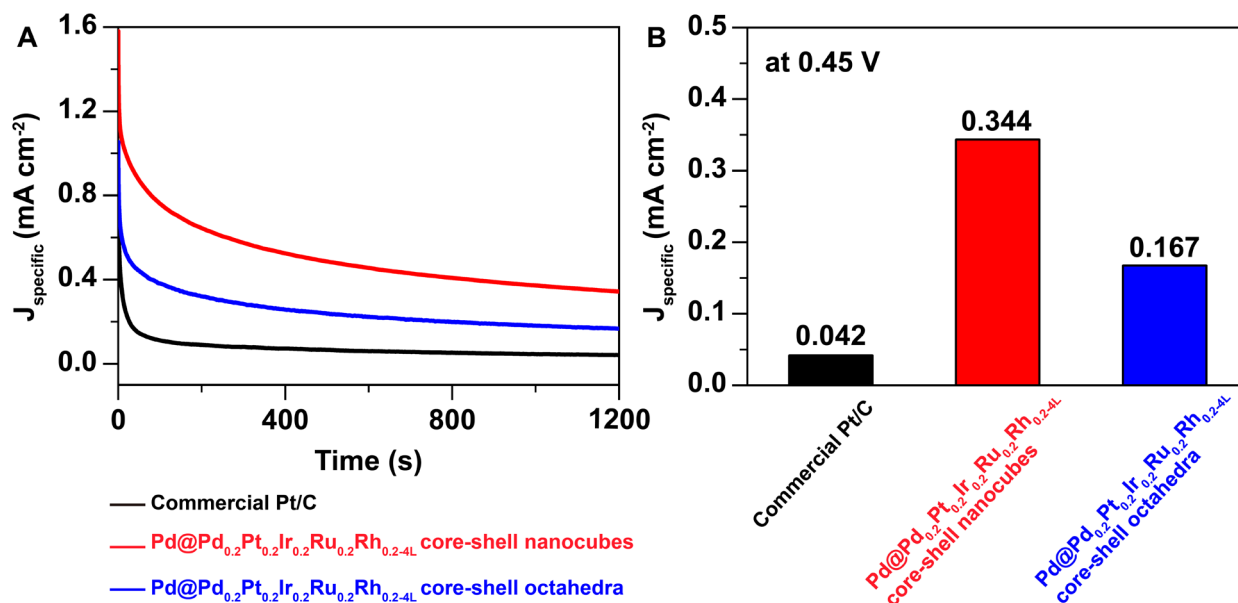

**Figure S27.** EOR long-term stability test in a  $\text{N}_2$ -saturated 1 M ethanol + 1 M KOH electrolyte. (A) Chronoamperometric test at a fixed potential of 0.45 V for 1200 s. (B) Comparing the steady-state current density normalized to ECSA at 1200 s. The current densities of  $\text{Pd@Pd}_{0.2}\text{Pt}_{0.2}\text{Ir}_{0.2}\text{Ru}_{0.2}\text{Rh}_{0.2-4\text{L}}$  core-shell nanocubes and  $\text{Pd@Pd}_{0.2}\text{Pt}_{0.2}\text{Ir}_{0.2}\text{Ru}_{0.2}\text{Rh}_{0.2-4\text{L}}$  core-shell octahedra were 8.2 times and 4.0 times higher than that of commercial Pt/C, respectively, indicating the higher durability against poisoning by catalytic intermediates.

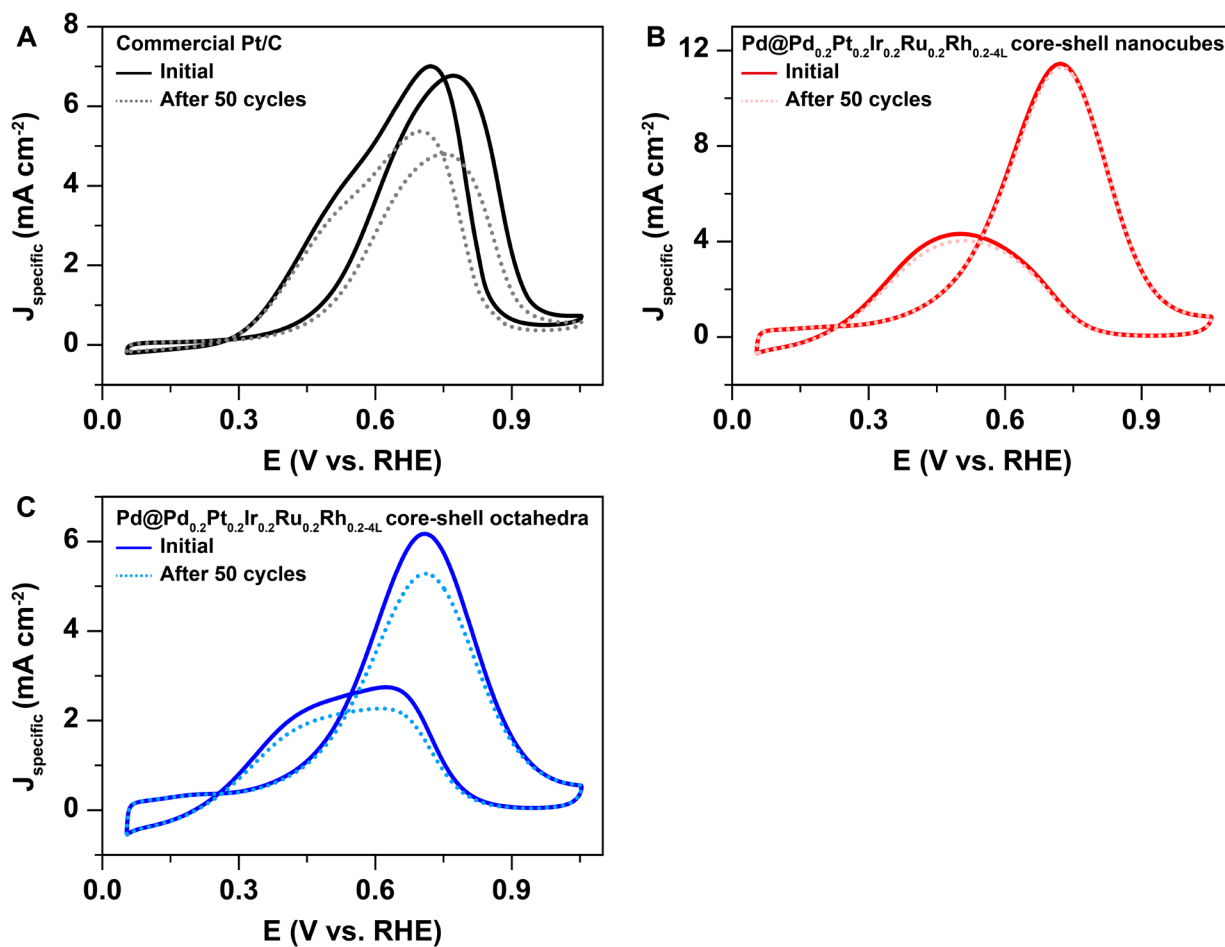

**Figure S28.** CV profiles for the EOR in  $N_2$ -saturated 1 M ethanol + 1 M KOH electrolyte at 1 and 50 cycles of (A) commercial Pt/C, (B) Pd@Pd<sub>0.2</sub>Pt<sub>0.2</sub>Ir<sub>0.2</sub>Ru<sub>0.2</sub>Rh<sub>0.2-4L</sub> core-shell nanocubes, and (C) Pd@Pd<sub>0.2</sub>Pt<sub>0.2</sub>Ir<sub>0.2</sub>Ru<sub>0.2</sub>Rh<sub>0.2-4L</sub> core-shell octahedra. The higher stabilities of Pd@Pd<sub>0.2</sub>Pt<sub>0.2</sub>Ir<sub>0.2</sub>Ru<sub>0.2</sub>Rh<sub>0.2-4L</sub> samples imply the optimal surface configurations for EOR.

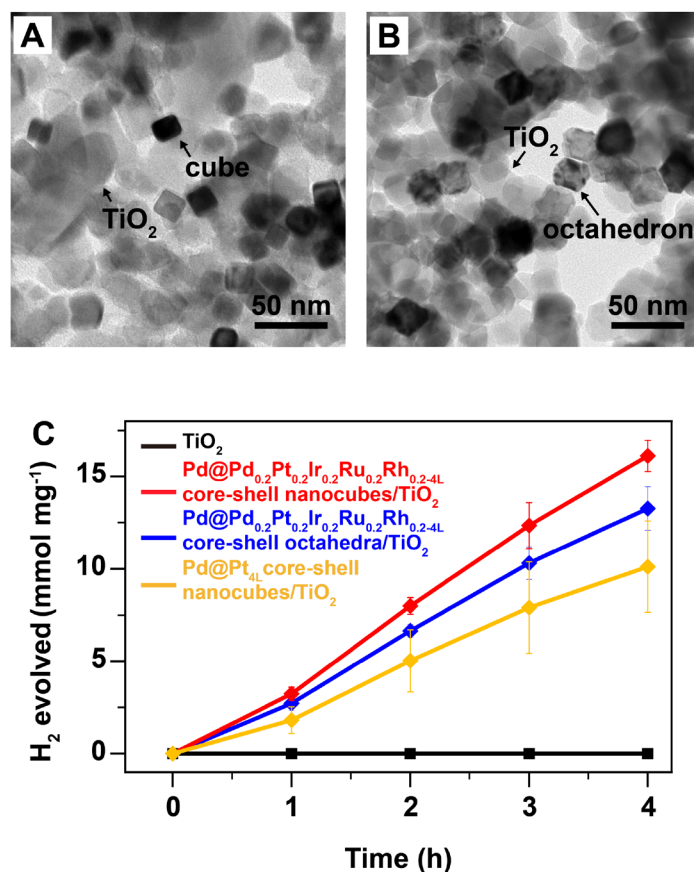

**Figure S29.** (A-B) TEM images of Pd@Pd<sub>0.2</sub>Pt<sub>0.2</sub>Ir<sub>0.2</sub>Ru<sub>0.2</sub>Rh<sub>0.2-4L</sub> core-shell (A) cubic and (B) octahedral nanocrystals loaded on commonly used TiO<sub>2</sub> P25 semiconductor photocatalysts. (C) Photocatalytic hydrogen evolution activities of pure TiO<sub>2</sub> P25, Pd@Pd<sub>0.2</sub>Pt<sub>0.2</sub>Ir<sub>0.2</sub>Ru<sub>0.2</sub>Rh<sub>0.2-4L</sub> core-shell nanocubes/TiO<sub>2</sub>, Pd@Pd<sub>0.2</sub>Pt<sub>0.2</sub>Ir<sub>0.2</sub>Ru<sub>0.2</sub>Rh<sub>0.2-4L</sub> core-shell octahedra/TiO<sub>2</sub>, and Pd@Pt<sub>4L</sub> core-shell nanocubes/TiO<sub>2</sub> photocatalysts over the period of 4 h.

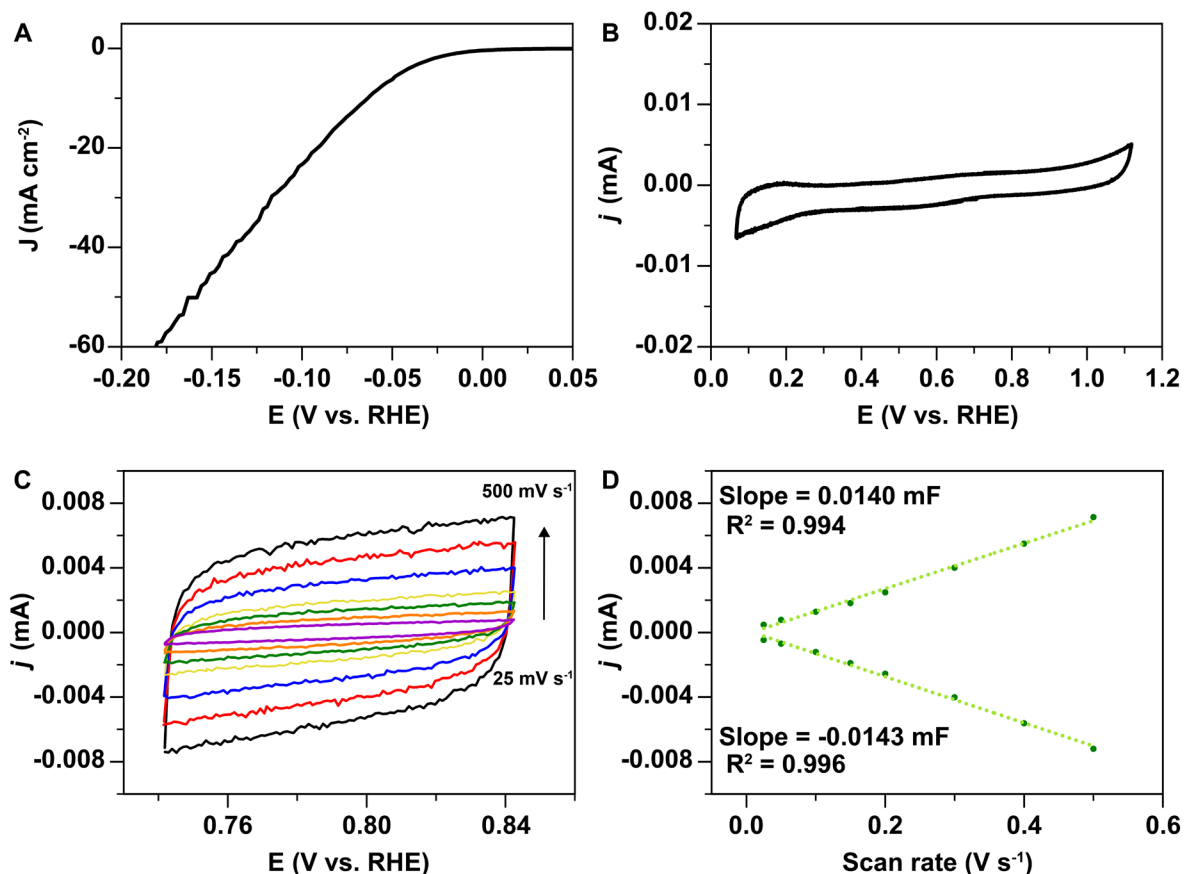

**Figure S30.** Electrocatalytic HER performance of Pd@Pt<sub>0.2</sub>Ir<sub>0.2</sub>Co<sub>0.2</sub>Fe<sub>0.2</sub>Ni<sub>0.2-5-6L</sub> core-shell nanocubes in the 0.5 M H<sub>2</sub>SO<sub>4</sub> electrolyte. (A) LSV, (B) CV curves recorded between 0.05 and 1.1 V with a scan rate of 50 mV s<sup>-1</sup>. (C-D) Cyclic voltammograms analysis for determining the double-layer capacitance. (C) CV curves at the scan rate from 25 mV s<sup>-1</sup> to 500 mV s<sup>-1</sup>, and (D) the anodic and cathodic current distribution as a function of scan rate. Due to the significant difference in the hydrogen adsorption capacity between iron-group (i.e., Co, Ni, and Fe) and platinum-group metals, using the hydrogen deposition method to estimate the ECSA of Pd@Pt<sub>0.2</sub>Ir<sub>0.2</sub>Co<sub>0.2</sub>Fe<sub>0.2</sub>Ni<sub>0.2-5-6L</sub> core-shell nanocubes could lead to an underestimation of the ECSA. Thus, we used C<sub>dl</sub> method to estimate the ECSA of Pd@Pt<sub>0.2</sub>Ir<sub>0.2</sub>Co<sub>0.2</sub>Fe<sub>0.2</sub>Ni<sub>0.2-5-6L</sub> core-shell nanocubes<sup>5,6</sup>, showing that the C<sub>dl</sub> of Pd@Pt<sub>0.2</sub>Ir<sub>0.2</sub>Co<sub>0.2</sub>Fe<sub>0.2</sub>Ni<sub>0.2-5-6L</sub> core-shell nanocubes was 0.0142 mF. For comparison, the catalytic activity (where the current is normalized by C<sub>dl</sub>) at the overpotential of 0.1 V for Pd@Pt<sub>0.2</sub>Ir<sub>0.2</sub>Co<sub>0.2</sub>Fe<sub>0.2</sub>Ni<sub>0.2-5-6L</sub> core-shell nanocubes was 2.6 times higher than that of commercial Pt/C with a C<sub>dl</sub> value of 0.0566 mF (Figure S11).

**Table S1.** Synthetic strategies and catalytic applications of HEA nanocrystals in recent reports.

| Materials              | Methods                              | Crystal structures | Geometric shapes     | Catalytic reactions                                     | Ref.                                                    |
|------------------------|--------------------------------------|--------------------|----------------------|---------------------------------------------------------|---------------------------------------------------------|
| PdCuAuAgBiIn           | Freeze–thaw method                   | <i>fcc</i>         | Aerogel              | CO <sub>2</sub> reduction reaction (CO <sub>2</sub> RR) | <i>Adv. Mater.</i> <b>2023</b> , 35, 2209242            |
| PtIrCuNiCr, PtAuPdFeNi | Laser scanning ablation              | <i>fcc</i>         | Spherical particles  | HER, oxygen evolution reaction (OER)                    | <i>Nat Synth.</i> <b>2023</b> , 1, 138–146              |
| PtIrPdRhRuCuNiCo       | Solvothermal synthesis               | <i>fcc</i>         | Spherical particles  | --                                                      | <i>Chem. Mater.</i> <b>2023</b> , 35, 144–153           |
| NiFeCoCuSnMo           | Sparking synthesis                   | <i>fcc</i>         | Spherical particles  | Lithium–sulfur redox reaction                           | <i>Nat. Nanotechnol.</i> <b>2023</b> , 18, 153–159      |
| NiPdPtRhIr             | Wet-chemical synthesis               | <i>fcc</i>         | Spherical particles  | --                                                      | Doi: 10.1021/acsnano.3c00176                            |
| IrPdPtRhRu             | Wet-chemical synthesis               | <i>fcc</i>         | Spherical particles  | HER                                                     | <i>J. Am. Chem. Soc.</i> <b>2022</b> , 144, 3365–3369   |
| FeCoNiMnRu             | Polymer nanofiber reactor            | <i>fcc</i>         | Spherical particles  | HER, OER                                                | <i>Nat. Comm.</i> <b>2022</b> , 13, 2662                |
| FeCoNiCuPdIrPtAu       | Fast moving bed pyrolysis            | <i>fcc</i>         | Spherical particles  | --                                                      | <i>Nat. Comm.</i> <b>2022</b> , 13, 2789                |
| FeCoNiSnPd             | High-temperature shock               | <i>fcc</i>         | Spherical particles  | EOR                                                     | <i>Adv. Funct. Mater.</i> <b>2022</b> , 32, 2204643     |
| PtCoCuRuNiFe           | Thermal decomposition reduction      | <i>fcc</i>         | Spherical particles  | Methanol oxidation reaction (MOR)                       | <i>ACS Nano</i> <b>2022</b> , 16, 14017–14028           |
| PdCuPtNiCo, PdCuPtNiFe | Wet-chemical synthesis and annealing | <i>fcc</i>         | Spherical particles  | Oxygen reduction reaction (ORR)                         | <i>ACS Nano</i> <b>2022</b> , 16, 18873–18885           |
| PtPdIrRuAg             | Wet-chemical synthesis               | <i>fcc</i>         | Subnanometer ribbons | ORR                                                     | <i>J. Am. Chem. Soc.</i> <b>2022</b> , 144, 10582–10590 |
| IrPdPtRhRu             | Continuous-flow reactor synthesis    | <i>fcc</i>         | Spherical particles  | HER                                                     | <i>J. Am. Chem. Soc.</i> <b>2022</b> , 144, 11525–11529 |
| PdMoGaInNi             | Wet-chemical synthesis               | <i>fcc</i>         | Nanosheets           | HER                                                     | <i>ACS Catal.</i> <b>2022</b> , 12, 11955–11959         |
| CoNiCuRuPd             | Hydrogen spillover-driven synthesis  | <i>fcc</i>         | Spherical particles  | CO <sub>2</sub> RR                                      | <i>Nat. Comm.</i> <b>2021</b> , 12, 3884                |
| PtRuNiCoFeMo           | Wet-chemical synthesis               | <i>fcc</i>         | Nanowires            | Hydrogen oxidation reaction (HOR)                       | <i>Nat. Comm.</i> <b>2021</b> , 12, 6261                |
| RuFeCoNiCu             | Wet-chemical synthesis               | <i>hcp</i>         | Spherical particles  | Nitrogen reduction reaction (N <sub>2</sub> RR)         | <i>Adv. Funct. Mater.</i> <b>2021</b> , 31, 2006939     |
| AlPdNiCuMo             | Dealloying                           | <i>fcc</i>         | Nanoporous HEA       | EOR                                                     | <i>Adv. Funct. Mater.</i> <b>2021</b> , 31, 2007129     |
| PtPdFeCoNi             | Microwave heating                    | <i>fcc</i>         | Spherical particles  | --                                                      | <i>ACS Nano</i> <b>2021</b> , 15, 14928–14937           |
| NiCoFePtRh             | Co-reduction and annealing           | <i>fcc</i>         | Spherical particles  | HER                                                     | <i>J. Am. Chem. Soc.</i> <b>2021</b> , 143, 17117–17127 |
| PtNiFeCoCu             | Wet-chemical synthesis               | <i>fcc</i>         | Spherical particles  | HER, MOR                                                | <i>Nat. Comm.</i> <b>2020</b> , 11, 5437                |

|                                    |                                        |                  |                            |                               |                                                                              |
|------------------------------------|----------------------------------------|------------------|----------------------------|-------------------------------|------------------------------------------------------------------------------|
| RuIrFeCoNi                         | Droplet-to-particle                    | <i>fcc</i>       | Hollow spherical particles | ORR, OER                      | <i>Adv. Mater.</i> <b>2020</b> , 32, 2002853                                 |
| FeCoNiCuPt, FeCoNiPdPt, FeCoNiCuPd | Aerosol synthesis                      | <i>fcc</i>       | Spherical particles        | --                            | <i>Langmuir</i> <b>2020</b> , 36, 1985–1992                                  |
| RuRhPdOsIrPt                       | Wet-chemical synthesis                 | <i>fcc</i>       | Spherical particles        | EOR                           | <i>J. Am. Chem. Soc.</i> <b>2020</b> , 142, 13833–13838                      |
| AuAgPtPdCu                         | Melting and cryogrinding               | <i>fcc</i>       | Spherical particles        | CO <sub>2</sub> RR            | <i>ACS. Catal.</i> <b>2020</b> , 10, 3658–3663                               |
| PdIrPtRhRu                         | Solvothermal synthesis                 | <i>fcc</i>       | Spherical particles        | --                            | <i>Angew. Chem. Int. Ed.</i> <b>2020</b> , 59, 21920–21924                   |
| CoFeLaNiPt                         | Nanodroplet-mediated electrodeposition | <i>amorphous</i> | Irregular particle         | HER, OER                      | <i>Nat Commun.</i> <b>2019</b> , 10, 2650                                    |
| CoMoFeNiCu                         | Carbothermal shock                     | <i>fcc</i>       | Spherical particles        | NH <sub>3</sub> decomposition | <i>Nat. Comm.</i> <b>2019</b> , 10, 4011                                     |
| PtPdCoNiFeAuCuSn                   | Carbothermal shock                     | <i>fcc</i>       | Spherical particles        | NH <sub>3</sub> oxidation     | <i>Science</i> , <b>2018</b> , 359, 1489–1494                                |
| FeCoPdIrPt                         | Fast-moving bed pyrolysis              | <i>fcc</i>       | Spherical particles        | HER                           | <i>Nat. Comm.</i> <b>2016 (2020)</b> , 11<br>Doi: 10.1038/s41467-020-15934-1 |

---

**Table S2.** Reduction potentials of the metal salt precursors and crystal structures of the metals.<sup>7,8</sup><sup>a</sup>Standard conditions: 25 °C and 1 atm. SHE: standard hydrogen electrode.

| Reduction                                            | $E_0$                   | Metal | Crystal    | Lattice               |
|------------------------------------------------------|-------------------------|-------|------------|-----------------------|
| reaction                                             | (V vs SHE) <sup>a</sup> |       | lattice    | constant (Å)          |
| $\text{Au}^{3+} + 3\text{e}^- \rightarrow \text{Au}$ | 1.50                    | Au    | <i>fcc</i> | 4.08                  |
| $\text{Pt}^{2+} + 2\text{e}^- \rightarrow \text{Pt}$ | 1.18                    | Pt    | <i>fcc</i> | 3.92                  |
| $\text{Ir}^{3+} + 3\text{e}^- \rightarrow \text{Ir}$ | 1.16                    | Ir    | <i>fcc</i> | 3.84                  |
| $\text{Pd}^{2+} + 2\text{e}^- \rightarrow \text{Pd}$ | 0.95                    | Pd    | <i>fcc</i> | 3.89                  |
| $\text{Os}^{4+} + 4\text{e}^- \rightarrow \text{Os}$ | 0.85                    | Os    | <i>hcp</i> | a = 2.73<br>c = 4.32  |
| $\text{Rh}^{3+} + 3\text{e}^- \rightarrow \text{Rh}$ | 0.76                    | Rh    | <i>fcc</i> | 3.80                  |
| $\text{Ru}^{3+} + 3\text{e}^- \rightarrow \text{Ru}$ | 0.45                    | Ru    | <i>hcp</i> | a = 2.71,<br>c = 4.28 |
| $\text{Ni}^{2+} + 2\text{e}^- \rightarrow \text{Ni}$ | -0.25                   | Ni    | <i>fcc</i> | 3.52                  |
| $\text{Co}^{2+} + 2\text{e}^- \rightarrow \text{Co}$ | -0.28                   | Co    | <i>hcp</i> | a = 2.51,<br>c = 4.07 |
| $\text{Fe}^{2+} + 2\text{e}^- \rightarrow \text{Fe}$ | -0.44                   | Fe    | <i>bcc</i> | 2.87                  |

**Table S3.** ICP-OES results of the atomic compositions of shells in the core-shell nanocrystals obtained in this work.

| Sample name                                                                                                                                                                                                    | Composition of shell (at %) |      |      |      |      |      |      |
|----------------------------------------------------------------------------------------------------------------------------------------------------------------------------------------------------------------|-----------------------------|------|------|------|------|------|------|
|                                                                                                                                                                                                                | Pt                          | Pd   | Ir   | Ru   | Rh   | Os   | Au   |
| Pd@Pd <sub>0.2</sub> Pt <sub>0.2</sub> Ir <sub>0.2</sub> Ru <sub>0.2</sub> Rh <sub>0.2-2L</sub> core-shell nanocubes                                                                                           | 19.7                        | 21.9 | 17.9 | 18.5 | 22.0 | --   | --   |
| Pd@Pd <sub>0.2</sub> Pt <sub>0.2</sub> Ir <sub>0.2</sub> Ru <sub>0.2</sub> Rh <sub>0.2-4L</sub> core-shell nanocubes                                                                                           | 22.3                        | 18.2 | 19.3 | 19.6 | 20.7 | --   | --   |
| Pd@Pd <sub>0.2</sub> Pt <sub>0.2</sub> Ir <sub>0.2</sub> Ru <sub>0.2</sub> Rh <sub>0.2-6L</sub> core-shell nanocubes                                                                                           | 21.2                        | 20.3 | 20.0 | 18.9 | 19.6 | --   | --   |
| Pd@Pd <sub>0.2</sub> Pt <sub>0.2</sub> Ir <sub>0.2</sub> Ru <sub>0.2</sub> Rh <sub>0.2-4L</sub> core-shell octahedra                                                                                           | 22.4                        | 17.6 | 19.1 | 19.9 | 21.0 | --   | --   |
| Pd@Pd <sub>0.2</sub> Pt <sub>0.2</sub> Ir <sub>0.2</sub> Ru <sub>0.2</sub> Rh <sub>0.2-4L</sub> core-shell nanocubes (14.4 nm)                                                                                 | 22.3                        | 18.4 | 19.1 | 19.6 | 20.6 | --   | --   |
| Pd@Pt <sub>0.33</sub> Ir <sub>0.33</sub> Ru <sub>0.33-6L</sub> core-shell nanocubes                                                                                                                            | 36.3                        | --   | 31.3 | 32.4 | --   | --   | --   |
| Pd@Pt <sub>0.25</sub> Ir <sub>0.25</sub> Ru <sub>0.25</sub> Rh <sub>0.25-6L</sub> core-shell nanocubes                                                                                                         | 27.3                        | --   | 23.7 | 23.8 | 25.3 | --   | --   |
| Pd@Pt <sub>0.2</sub> Ir <sub>0.2</sub> Ru <sub>0.2</sub> Rh <sub>0.2</sub> Au <sub>0.2-7L</sub> core-shell nanocubes                                                                                           | 21.5                        | --   | 19.8 | 21.4 | 22.4 | --   | 14.8 |
| Pd@Pd <sub>0.17</sub> Pt <sub>0.17</sub> Ir <sub>0.17</sub> Ru <sub>0.17</sub> Rh <sub>0.17</sub> Au <sub>0.17-7L</sub> core-shell nanocubes                                                                   | 17.7                        | 17.7 | 16.3 | 17.7 | 18.5 | --   | 12.1 |
| Pd@Pd <sub>0.14</sub> Pt <sub>0.14</sub> Ir <sub>0.14</sub> Ru <sub>0.14</sub> Rh <sub>0.14</sub> Os <sub>0.14</sub> Au <sub>0.14-7L</sub> core-shell nanocubes                                                | 16.2                        | 10.1 | 15.1 | 15.3 | 17.4 | 13.9 | 12.1 |
| Pd@Pd <sub>0.225</sub> Pt <sub>0.1</sub> Ir <sub>0.225</sub> Ru <sub>0.225</sub> Rh <sub>0.225-4L</sub> core-shell nanocubes                                                                                   | 11.1                        | 23.5 | 21.0 | 21.5 | 22.9 | --   | --   |
| Pd@Pd <sub>0.175</sub> Pt <sub>0.3</sub> Ir <sub>0.175</sub> Ru <sub>0.175</sub> Rh <sub>0.175-4L</sub> core-shell nanocubes                                                                                   | 32.7                        | 15.0 | 16.9 | 17.4 | 18.1 | --   | --   |
| Pd@Pd <sub>0.15</sub> Pt <sub>0.4</sub> Ir <sub>0.15</sub> Ru <sub>0.15</sub> Rh <sub>0.15-4L</sub> core-shell nanocubes                                                                                       | 39.9                        | 16.9 | 13.5 | 13.9 | 15.9 | --   | --   |
| Pd@Pd <sub>0.125</sub> Pt <sub>0.5</sub> Ir <sub>0.125</sub> Ru <sub>0.125</sub> Rh <sub>0.125-4L</sub> core-shell nanocubes                                                                                   | 50.3                        | 12.4 | 11.5 | 11.8 | 13.9 | --   | --   |
| Pd@Pd <sub>0.1</sub> Pt <sub>0.6</sub> Ir <sub>0.1</sub> Ru <sub>0.1</sub> Rh <sub>0.1-4L</sub> core-shell nanocubes                                                                                           | 59.6                        | 9.9  | 9.3  | 9.6  | 11.7 | --   | --   |
| Pd@Pt <sub>0.2</sub> Ir <sub>0.2</sub> Co <sub>0.2</sub> Fe <sub>0.2</sub> Ni <sub>0.2-5-6L</sub> core-shell nanocubes                                                                                         | Co                          | Fe   | Ni   | Pt   | Ir   |      |      |
|                                                                                                                                                                                                                | 27.8                        | 22.2 | 20.1 | 21.6 | 11.0 |      |      |
| Pd@Pd <sub>0.1</sub> Pt <sub>0.1</sub> Ir <sub>0.1</sub> Ru <sub>0.1</sub> Rh <sub>0.1</sub> Os <sub>0.1</sub> Au <sub>0.1</sub> Co <sub>0.1</sub> Fe <sub>0.1</sub> Ni <sub>0.1-6L</sub> core-shell nanocubes | Co                          | Fe   | Ni   | Pt   | Pd   | Ir   | Ru   |
|                                                                                                                                                                                                                | 3.4                         | 10.6 | 15.4 | 7.7  | 9.9  | 12.6 | 9.3  |
|                                                                                                                                                                                                                | Rh                          | Os   | Au   |      |      |      |      |
|                                                                                                                                                                                                                | 10.1                        | 9.9  | 11.0 |      |      |      |      |
| Sample name                                                                                                                                                                                                    | Total composition (at%)     |      |      |      |      |      |      |
|                                                                                                                                                                                                                | Pt                          | Pd   | Ir   | Ru   | Rh   |      |      |
| Pd <sub>0.2</sub> Pt <sub>0.2</sub> Ir <sub>0.2</sub> Ru <sub>0.2</sub> Rh <sub>0.2</sub> hollow nanocages                                                                                                     | 19.4                        | 28.0 | 14.3 | 21.3 | 17.0 |      |      |

**Table S4.** Average atomic layers (n) of shell calculated from the ICP-OES data for the Pd, Pt, Ir, Ru, Rh, Os, Au, Co, Fe, and Ni contents in the core-shell nanocrystals; the atomic percentage (at %) of shell calculated from the atomic layers (n) and the size of Pd seeds with cubic and octahedral shapes; and the at % of shell calculated from the ICP-OES data.

| Sample name                                                                                                                                                                                                    | n atomic layers | at % of shell derived from calculation | at % of shell derived from ICP-OES data |
|----------------------------------------------------------------------------------------------------------------------------------------------------------------------------------------------------------------|-----------------|----------------------------------------|-----------------------------------------|
| Pd@Pd <sub>0.2</sub> Pt <sub>0.2</sub> Ir <sub>0.2</sub> Ru <sub>0.2</sub> Rh <sub>0.2-2L</sub> core-shell nanocubes                                                                                           | 2               | 10.9%                                  | 11.2%                                   |
| Pd@Pd <sub>0.2</sub> Pt <sub>0.2</sub> Ir <sub>0.2</sub> Ru <sub>0.2</sub> Rh <sub>0.2-4L</sub> core-shell nanocubes                                                                                           | 4               | 20.4%                                  | 19.9%                                   |
| Pd@Pd <sub>0.2</sub> Pt <sub>0.2</sub> Ir <sub>0.2</sub> Ru <sub>0.2</sub> Rh <sub>0.2-6L</sub> core-shell nanocubes                                                                                           | 6               | 28.6%                                  | 29.9%                                   |
| Pd@Pd <sub>0.2</sub> Pt <sub>0.2</sub> Ir <sub>0.2</sub> Ru <sub>0.2</sub> Rh <sub>0.2-4L</sub> core-shell octahedra                                                                                           | 4               | 22.9%                                  | 20.8%                                   |
| Pd@Pd <sub>0.2</sub> Pt <sub>0.2</sub> Ir <sub>0.2</sub> Ru <sub>0.2</sub> Rh <sub>0.2-4L</sub> core-shell nanocubes (14.4 nm)                                                                                 | 4               | 27.4%                                  | 27.2%                                   |
| Pd@Pt <sub>0.33</sub> Ir <sub>0.33</sub> Ru <sub>0.33-6L</sub> core-shell nanocubes                                                                                                                            | 6               | 28.6%                                  | 29.5%                                   |
| Pd@Pt <sub>0.25</sub> Ir <sub>0.25</sub> Ru <sub>0.25</sub> Rh <sub>0.25-6L</sub> core-shell nanocubes                                                                                                         | 6               | 28.6%                                  | 29.3%                                   |
| Pd@Pt <sub>0.2</sub> Ir <sub>0.2</sub> Ru <sub>0.2</sub> Rh <sub>0.2</sub> Au <sub>0.2-7L</sub> core-shell nanocubes                                                                                           | 7               | 32.4%                                  | 33.9%                                   |
| Pd@Pt <sub>0.2</sub> Ir <sub>0.2</sub> Co <sub>0.2</sub> Fe <sub>0.2</sub> Ni <sub>0.2-5-6L</sub> core-shell nanocubes                                                                                         | 5-6             | 24.6% (5L)<br>28.6% (6L)               | 26.5%                                   |
| Pd@Pd <sub>0.17</sub> Pt <sub>0.17</sub> Ir <sub>0.17</sub> Ru <sub>0.17</sub> Rh <sub>0.17</sub> Au <sub>0.17-7L</sub> core-shell nanocubes                                                                   | 7               | 32.4%                                  | 33.9%                                   |
| Pd@Pd <sub>0.14</sub> Pt <sub>0.14</sub> Ir <sub>0.14</sub> Ru <sub>0.14</sub> Rh <sub>0.14</sub> Os <sub>0.14</sub> Au <sub>0.14-7L</sub> core-shell nanocubes                                                | 7               | 32.4%                                  | 31.9%                                   |
| Pd@Pd <sub>0.1</sub> Pt <sub>0.1</sub> Ir <sub>0.1</sub> Ru <sub>0.1</sub> Rh <sub>0.1</sub> Os <sub>0.1</sub> Au <sub>0.1</sub> Co <sub>0.1</sub> Fe <sub>0.1</sub> Ni <sub>0.1-6L</sub> core-shell nanocubes | 6               | 28.6%                                  | 29.6%                                   |
| Pd@Pd <sub>0.225</sub> Pt <sub>0.1</sub> Ir <sub>0.225</sub> Ru <sub>0.225</sub> Rh <sub>0.225-4L</sub> core-shell nanocubes                                                                                   | 4               | 20.4%                                  | 20.3%                                   |
| Pd@Pd <sub>0.175</sub> Pt <sub>0.3</sub> Ir <sub>0.175</sub> Ru <sub>0.175</sub> Rh <sub>0.175-4L</sub> core-shell nanocubes                                                                                   | 4               | 20.4%                                  | 19.9%                                   |
| Pd@Pd <sub>0.15</sub> Pt <sub>0.4</sub> Ir <sub>0.15</sub> Ru <sub>0.15</sub> Rh <sub>0.15-4L</sub> core-shell nanocubes                                                                                       | 4               | 20.4%                                  | 17.6%                                   |
| Pd@Pd <sub>0.125</sub> Pt <sub>0.5</sub> Ir <sub>0.125</sub> Ru <sub>0.125</sub> Rh <sub>0.125-4L</sub> core-shell nanocubes                                                                                   | 4               | 20.4%                                  | 19.9%                                   |
| Pd@Pd <sub>0.1</sub> Pt <sub>0.6</sub> Ir <sub>0.1</sub> Ru <sub>0.1</sub> Rh <sub>0.1-4L</sub> core-shell nanocubes                                                                                           | 4               | 20.4%                                  | 19.7%                                   |
| Pd@Pt <sub>4L</sub> core-shell nanocubes                                                                                                                                                                       | 4               | 20.4%                                  | 21.8%                                   |
| Pd@Pd <sub>4L</sub> core-shell nanocubes                                                                                                                                                                       | 4               | 20.4%                                  | 20.4%                                   |
| Pd@Ir <sub>4L</sub> core-shell nanocubes                                                                                                                                                                       | 4               | 20.4%                                  | 19.3%                                   |
| Pd@Ru <sub>4L</sub> core-shell nanocubes                                                                                                                                                                       | 4               | 20.4%                                  | 20.0%                                   |
| Pd@Rh <sub>4L</sub> core-shell nanocubes                                                                                                                                                                       | 4               | 20.4%                                  | 21.3%                                   |

**Table S5.** The binding energy of each element in the core-level XPS analysis of Pd@Pd<sub>0.2</sub>Pt<sub>0.2</sub>Ir<sub>0.2</sub>Ru<sub>0.2</sub>Rh<sub>0.2-4L</sub> core-shell nanocubes (Figure 2A and B) and octahedra (Figure S5) along with the table lookup values. (Note: Table lookup values are from the *Handbook of X-ray Photoelectron Spectroscopy*. J. F. Modulder, W. F. Stickle, P. E. Sobol, K. D. Bomben. Perkin-Elmer Corp. 1992)

| Sample                                                                                                               | Ru 3d <sub>5/2</sub> | Rh 3d <sub>5/2</sub> | Pd 3d <sub>5/2</sub> | Ir 4f <sub>7/2</sub> | Pt 4f <sub>7/2</sub> |
|----------------------------------------------------------------------------------------------------------------------|----------------------|----------------------|----------------------|----------------------|----------------------|
| <b>Table lookup value</b>                                                                                            | <b>280.1</b>         | <b>307.0</b>         | <b>335.1</b>         | <b>60.9</b>          | <b>71.2</b>          |
| Pd@Pd <sub>0.2</sub> Pt <sub>0.2</sub> Ir <sub>0.2</sub> Ru <sub>0.2</sub> Rh <sub>0.2-4L</sub> core-shell nanocubes | 280                  | 307.1                | 335.3                | 60.5                 | 71.3                 |
| Pd@Pd <sub>0.2</sub> Pt <sub>0.2</sub> Ir <sub>0.2</sub> Ru <sub>0.2</sub> Rh <sub>0.2-4L</sub> core-shell octahedra | 280.1                | 307.0                | 335.1                | 60.6                 | 70.9                 |

**Table S6.** Comparison of the specific activities of facet-controlled Pd@HEA nanocrystals obtained in this work with other advanced noble metal catalysts reported previously toward HER in the acidic 0.5 M H<sub>2</sub>SO<sub>4</sub> electrolyte.

| Composition                                                                                                                                                                                                                                 | Catalyst loading (mg cm <sup>-2</sup> <sub>geo</sub> ) | $\eta$ (mV) for 10 mA cm <sup>-2</sup> | TOFs (at x overpotential) (s <sup>-1</sup> ) | Ref.                                                            |
|---------------------------------------------------------------------------------------------------------------------------------------------------------------------------------------------------------------------------------------------|--------------------------------------------------------|----------------------------------------|----------------------------------------------|-----------------------------------------------------------------|
| Al <sub>87</sub> Ag <sub>1</sub> Au <sub>1</sub> Co <sub>1</sub> Cu <sub>1</sub> Fe <sub>1</sub> Ir <sub>1</sub> Mo <sub>1</sub> Ni <sub>1</sub> Pd <sub>1</sub> Pt <sub>1</sub> Rh <sub>1</sub> Ru <sub>1</sub> Ti <sub>1</sub> (np-UHEAs) | ~0.25                                                  | 32                                     | --                                           | <i>Chem. Sci.</i> <b>2021</b> , 12, 11306–11315                 |
| PtRuRhCoNi NWs                                                                                                                                                                                                                              | 0.0142                                                 | 13                                     | 31.9@50 mV                                   | <i>Appl. Catal. B</i> <b>2022</b> , 312, 121431                 |
| Co–Fe–Ni–Pt–Ta–vxc72                                                                                                                                                                                                                        | 0.349                                                  | 10.6                                   | --                                           | <i>ACS Appl. Nano Mater.</i> <b>2022</b> , 5, 9810–9817         |
| NiCoFePtRh (us-HEA/C)                                                                                                                                                                                                                       | 0.0018                                                 | 27                                     | 11.0@25 mV<br>(Only consider Pt, Rh sites)   | <i>J. Am. Chem. Soc.</i> <b>2021</b> , 143, 17117–17127         |
| PdMnCo/NC-2                                                                                                                                                                                                                                 | 0.285                                                  | 34                                     | --                                           | <i>ACS Appl. Mater. Interfaces</i> <b>2017</b> , 9, 38419–38427 |
| Pt-Ru dual-metal dimers                                                                                                                                                                                                                     | 0.00167                                                | 14.4                                   | --                                           | <i>Nat. Commun.</i> <b>2019</b> , 10, 4936                      |
| PtRu@RFCS                                                                                                                                                                                                                                   | 0.0184                                                 | 19.7                                   | 4.03@100 mV                                  | <i>Energy Environ. Sci.</i> <b>2018</b> , 11, 1232–1239         |
| Ru/MeOH/THF                                                                                                                                                                                                                                 | 35.21                                                  | 83                                     | 0.87@100 mV                                  | <i>Chem. Commun.</i> <b>2017</b> , 53, 11713–11716              |
| RuIrO <sub>x</sub>                                                                                                                                                                                                                          | 0.01                                                   | 12                                     | --                                           | <i>Nat. Commun.</i> <b>2019</b> , 10, 4875                      |
| Ru@C <sub>2</sub> N                                                                                                                                                                                                                         | 0.0818                                                 | 13.5                                   | 0.67@25 mV<br>1.95@50 mV                     | <i>Nat. Nanotechnol.</i> <b>2017</b> , 12, 441–446              |
| PdCu@Pd NCs                                                                                                                                                                                                                                 | 0.14 (87.65 $\mu\text{g}_{\text{Pd}} \text{cm}^{-2}$ ) | 65                                     | 1.53@0 mV                                    | <i>ACS Appl. Mater. Interfaces</i> <b>2017</b> , 9, 8151–8160   |
| Ir@CON                                                                                                                                                                                                                                      | 0.1025                                                 | 13.6                                   | 0.66@25 mV                                   | <i>Adv. Mater.</i> <b>2018</b> , 30, 1805606                    |
| Ru@NG                                                                                                                                                                                                                                       | 0.2014                                                 | 42.7                                   | 0.042@25 mV<br>0.144@50 mV<br>0.519@100 mV   | <i>J. Mater. Chem. A</i> <b>2018</b> , 6, 13859–13866           |
| Pt@PCM                                                                                                                                                                                                                                      | 0.0112                                                 | 105                                    | 43.6@500 mV                                  | <i>Sci. Adv.</i> , <b>2018</b> , 4, eaao6657.                   |
| Pt/Si                                                                                                                                                                                                                                       | 0.0358                                                 | 46                                     | 25.7@50 mV                                   | <i>Adv. Mater.</i> <b>2020</b> , 32, 1906384                    |
| Pt <sub>81</sub> Fe <sub>28</sub> Co <sub>10</sub>                                                                                                                                                                                          | 0.0449                                                 | ~20                                    | --                                           | <i>Adv Mater.</i> <b>2016</b> , 28, 2077–2084                   |
| Ni <sub>43</sub> Ru <sub>57</sub> nanoalloy                                                                                                                                                                                                 | 0.1678                                                 | 41                                     | --                                           | <i>ACS Appl. Mater. Interfaces</i> <b>2017</b> , 9, 17326–17336 |
| Ru/NG-750                                                                                                                                                                                                                                   | 0.0242                                                 | 53                                     | 0.04@100 mV                                  | <i>ACS Appl. Mater. Interfaces</i> <b>2017</b> , 9,             |

|                                                                                                                                                         |        |      |                                        |                                                        |
|---------------------------------------------------------------------------------------------------------------------------------------------------------|--------|------|----------------------------------------|--------------------------------------------------------|
|                                                                                                                                                         |        |      |                                        | 3785–3791                                              |
| Pd@PdPt                                                                                                                                                 | 0.566  | 39   | --                                     | <i>J. Mater. Chem. A.</i> <b>2016</b> , 4, 16690–16697 |
| NiAu/Au                                                                                                                                                 | 0.2037 | 50   | --                                     | <i>J Am Chem Soc.</i> <b>2015</b> , 137, 5859–5862     |
| Pt-Cu/CNFs-1:2                                                                                                                                          | --     | 71   | --                                     | <i>Adv. Mater. Interfaces</i> <b>2017</b> , 4, 1700005 |
| IrHNC                                                                                                                                                   | 0.25   | 4.5  | 4.21@25 mV                             | <i>Nat. Commun.</i> <b>2019</b> , 10, 4060             |
| Pt <sub>1</sub> /OLC                                                                                                                                    | 0.0014 | 38   | 40.78@100 mV                           | <i>Nat. Energy.</i> <b>2019</b> , 4, 512–518           |
| 1% PtW <sub>6</sub> O <sub>24</sub> /C                                                                                                                  | --     | 22   | 33.35@100 mV                           | <i>Nat. Commun.</i> <b>2020</b> , 11, 490              |
| Pd@Pd <sub>0.2</sub> Pt <sub>0.2</sub> Ir <sub>0.2</sub> Ru <sub>0.2</sub> Rh <sub>0.2-4L</sub> core-shell nanocubes (14.4 nm) enclosed by {100} facets | 0.0101 | 24.9 | 7.9@25 mV<br>21.3@50mV<br>49.3@100 mV  | This work                                              |
| Pd@Pd <sub>0.2</sub> Pt <sub>0.2</sub> Ir <sub>0.2</sub> Ru <sub>0.2</sub> Rh <sub>0.2-4L</sub> core-shell nanocubes enclosed by {100} facets           | 0.0101 | 41.9 | 3.9@25 mV<br>14.8@50 mV<br>44.6@100 mV | This work                                              |
| Pd@Pd <sub>0.2</sub> Pt <sub>0.2</sub> Ir <sub>0.2</sub> Ru <sub>0.2</sub> Rh <sub>0.2-4L</sub> core-shell octahedra enclosed by {111} facets           | 0.0101 | 46.6 | 3.4@25 mV<br>10.5@50 mV<br>28.1@100 mV | This work                                              |

---

**Table S7.** The calculated reaction barriers of the Tafel step of HER on the twelve representative Ru sites of the {100} and {111} surfaces of Pd@Pd<sub>0.2</sub>Pt<sub>0.2</sub>Ir<sub>0.2</sub>Ru<sub>0.2</sub>Rh<sub>0.2-4L</sub> core-shell nanocubes and octahedra, respectively. The possible reaction mechanisms regarding the adsorption sites of H\* are considered for each facet, including bridge-bridge, top-top, hcp-hcp, bridge-top, hcp-top, and hcp-bridge for HEA {100} and bridge-bridge, top-top, fcc-fcc, bridge-top, top-fcc, and fcc-bridge for HEA {111}.

| {100}                                      | Energy barrier | Fig. | {111}                                      | Energy barrier | Fig.  |
|--------------------------------------------|----------------|------|--------------------------------------------|----------------|-------|
| bridge <sub>Ru</sub> -bridge <sub>Ru</sub> | 0.20 eV        | 4 F  | bridge <sub>Ru</sub> -bridge <sub>Ru</sub> | 0.69 eV        | S21 A |
| top-top (H <sub>2</sub> formation on Ru)   | NA             |      | top-top                                    | NA             |       |
| hcp <sub>Ru</sub> -hcp <sub>Ru</sub>       | NA             |      | fcc <sub>Ru</sub> -fcc <sub>Ru</sub>       | NA             |       |
| top-bridge <sub>Ru</sub>                   | NA             |      | top-bridge <sub>Ru</sub>                   | NA             |       |
| hcp <sub>Ru</sub> -top                     | NA             |      | top-fcc <sub>Ru</sub>                      | 0.57 eV        | S21 B |
| hcp <sub>Ru</sub> -bridge <sub>Ru</sub>    | NA             |      | fcc <sub>Ru</sub> -bridge <sub>Ru</sub>    | 0.31 eV        | S21 C |

**Note:** NA mean not available, H cannot stabilize on these sites.

**Table S8.** Adsorption energy ( $\Delta H$ ) and free energy ( $\Delta G$ ) of H adsorption on the representative Ru sites and extra possible sites of the  $\{100\}$  and  $\{111\}$  surfaces of Pd@Pd<sub>0.2</sub>Pt<sub>0.2</sub>Ir<sub>0.2</sub>Ru<sub>0.2</sub>Rh<sub>0.2-4L</sub> core-shell nanocubes and octahedra, respectively. It can be seen that the Ru sites of both Pd@Pd<sub>0.2</sub>Pt<sub>0.2</sub>Ir<sub>0.2</sub>Ru<sub>0.2</sub>Rh<sub>0.2-4L</sub> core-shell nanocubes and octahedra achieved the comparable free energies of  $\Delta G$  in the range of -0.17 to -0.36 eV. Therefore, we consider that the kinetic barrier of the rate-determined Tafel step of HER (Figures 4F and S21) for these two surfaces may play an important factor in determining the corresponding facet-dependent catalytic effect for HER (Figures 4A and B).

| System          | H sites                          | $\Delta H$ (eV) | $\Delta G$ (eV) | Fig.  |
|-----------------|----------------------------------|-----------------|-----------------|-------|
| Ru $\{100\}$    | Ru-Pt                            | -0.48           | -0.25           | S22 A |
|                 | Ru-Pd                            | -0.51           | -0.28           | S22 B |
|                 | Ru-Ir                            | -0.46           | -0.22           | S22 C |
|                 | Ru-Rh                            | -0.51           | -0.28           | S22 D |
|                 | Ru-Ru                            | -0.60           | -0.36           | S22 E |
|                 | Ru-top moves to Ru-Ir            | -0.46           | -0.22           | S22 C |
|                 | Rh-Ru-Ru (hcp) moves to Ru-Ru    | -0.60           | -0.36           | S22 E |
| Ru $\{111\}$    | Pt-Ru-Ru                         | -0.49           | -0.26           | S23 A |
|                 | Pt-Ru-Rh                         | -0.40           | -0.17           | S23 B |
|                 | Ru-Pt-Pd                         | -0.48           | -0.25           | S23 C |
|                 | Ru-Rh-Rh                         | -0.57           | -0.34           | S23 D |
|                 | Ru-top moves to Pt-Ru-Ru         | -0.49           | -0.26           | S23 A |
|                 | Ru-Ru (bridge) moves to Pt-Ru-Ru | -0.49           | -0.26           | S23 A |
| Extra $\{100\}$ | Pt-Pd                            | -0.42           | -0.18           | S24 A |
|                 | Pt-Ir                            | -0.49           | -0.26           | S24 B |
|                 | Rh-Pt                            | -0.49           | -0.26           | S24 C |
|                 | Pd-Rh                            | -0.51           | -0.28           | S24 D |
|                 | Pt-Pt                            | -0.51           | -0.28           | S24 E |
| Extra $\{111\}$ | Ir-Pd-Rh                         | -0.44           | 0.21            | S25   |

**Table S9.** Adsorption energy ( $\Delta H$ ) and free energy ( $\Delta G$ ) of H adsorption on Pt {111} and Pt {100} surfaces.

| System   | H site | $\Delta H$ (eV) | $\Delta G$ (eV) | Fig.  |
|----------|--------|-----------------|-----------------|-------|
| Pt {111} | bridge | -0.44           | -0.21           | S26 A |
|          | fcc    | -0.55           | -0.32           | S26 B |
|          | top-Pt | -0.40           | -0.16           | S26 C |
|          | hcp    |                 | Move to bridge  |       |
| Pt {100} | bridge | -0.64           | -0.40           | S26 D |
|          | hcp    | -0.76           | -0.52           | S26 E |
|          | top-Pt | -1.01           | -0.78           | S26 F |

## References

1. Park, J. et al. Atomic layer-by-layer deposition of platinum on palladium octahedra for enhanced catalysts toward the oxygen reduction reaction. *ACS Nano* **9**, 2635–2647 (2015).
2. Moulder, J. F., Stickle, W. F., Sobol, P. E. & Bomben, K. D. *Handbook of X-ray Photoelectron Spectroscopy* (Perkin-Elmer, Minnesota, 1992), pp.114–195.
3. Morris, D. et al. Composition-dependent structure and properties of 5- and 15-element high-entropy alloy nanoparticles. *Cell Rep. Phys. Sci.* **2**, 100641 (2021).
4. Hurley, N., McGuire, S. C. & Wong, S. S. Assessing the catalytic behavior of platinum group metal-based ultrathin nanowires using X-ray absorption spectroscopy. *ACS Appl. Mater. Interfaces* **13**, 58253–58260 (2021).
5. Morales, D. M. & Risch, M. Seven steps to reliable cyclic voltammetry measurements for the determination of double layer capacitance. *J. Phys. Energy* **3**, 034013 (2021).
6. Glasscott, M. W. Classifying and benchmarking high-entropy alloys and associated materials for electrocatalysis: a brief review of best practices. *Curr. Opin. Electrochem.* **34**, 100976 (2022).
7. Gilroy, K. D., Ruditskiy, A., Peng, H. C., Qin, D. & Xia, Y. Bimetallic nanocrystals: syntheses, properties, and applications. *Chem. Rev.* **116**, 10414–10472 (2016).
8. Bard, A. J., Faulkner, L. R. & White, H. S. *Electrochemical Methods: Fundamentals and Applications*. (John Wiley & Sons, 2022).
